1

2 **Circuits in the absence of cortical layers: increased callosal connectivity in**  
3 **reeler mice revealed by brain-wide input mapping of VIP neurons in barrel**  
4 **cortex**

5

6 Georg Hafner<sup>1</sup>, Julien Guy<sup>1</sup>, Mirko Witte<sup>1</sup>, Pavel Truschow<sup>1</sup>, Alina Rüppel<sup>1</sup>, Nikoloz  
7 Sirmopilatze<sup>2</sup>, Rakshit Dadarwal<sup>2</sup>, Susann Boretius<sup>2</sup>, Jochen F. Staiger<sup>1,3,\*</sup>

8

9 <sup>1</sup> Institute for Neuroanatomy, University Medical Center, Georg-August-University  
10 Göttingen, 37075 Göttingen, Germany

11 <sup>2</sup> Functional Imaging Laboratory, German Primate Center - Leibniz Institute for  
12 Primate Research, 37077 Göttingen, Germany

13 <sup>3</sup>Lead Contact

14 \*Correspondence: [jochen.staiger@med.uni-goettingen.de](mailto:jochen.staiger@med.uni-goettingen.de)

1 **ABSTRACT**

2 The neocortex is composed of layers. Whether layers constitute an essential  
3 framework for the formation of functional circuits is not well understood. We  
4 investigated if neurons require the layer organization to be embedded into brain-wide  
5 circuits using the reeler mouse. This mutant is characterized by a migration deficit of  
6 cortical neurons so that no layers are formed. Still, neurons retain their properties and  
7 reeler mice show little cognitive impairment. We focused on VIP neurons because  
8 they are known to receive strong long-range inputs and have a typical laminar bias  
9 towards upper layers. In reeler these neurons are more distributed across the cortex.  
10 We mapped the brain-wide inputs of VIP neurons in barrel cortex of wildtype and  
11 reeler mice with rabies virus tracing. Innervation by subcortical inputs was not altered  
12 in reeler, in contrast to the cortical circuitry. Numbers of long-range ipsilateral cortical  
13 inputs were reduced in reeler, while contralateral inputs were strongly increased.  
14 Reeler mice had more callosal projection neurons. Hence, the corpus callosum was  
15 larger in reeler as shown by structural imaging. We argue that in the absence of  
16 cortical layers, circuits with subcortical structures are maintained but cortical neurons  
17 establish a different network capable to preserve cognitive functions.

18

19 **KEYWORDS**

20 barrel cortex, corpus callosum, rabies tracing, reelin, VIP neurons

## 1 INTRODUCTION

2

3 The neurons of the mammalian neocortex are stacked in layers (L). This organization  
4 is considered as an essential scaffolding principle that evolution could expand to  
5 generate increasingly sophisticated cognitive abilities (Shepherd and Rowe, 2017).  
6 Layers are seen as units of processing and their input-output connectivity defines the  
7 flow of information within the cortex (Feldmeyer, 2012; Miller, 2001). However, the  
8 notion of layers structuring the flow of cortical processing might be misleading.  
9 Cortical computations require foremost a functional neuronal circuit between defined  
10 cell types (Guy and Staiger, 2017; Harris and Shepherd, 2015). Because neurons  
11 exhibit surprising specificity in targeting of other neurons, there seem to be strict rules  
12 of connectivity (Kasthuri et al., 2015; Motta et al., 2019). These wiring rules might run  
13 in the framework of layers but perhaps are not determined by it. Whether the  
14 organization of layers constitutes an indispensable feature for the formation of  
15 cortical circuits is still unclear.

16 Therefore, we asked the question if correct laminar position is a necessary  
17 prerequisite for a neuron to receive inputs and become properly embedded in brain-  
18 wide circuits. An excellent model system to study the significance of layers is the  
19 reeler mouse (Guy and Staiger, 2017). Homozygous mice lack the protein reelin,  
20 which is secreted by Cajal-Retzius cells during development, to orchestrate the  
21 migration of neurons during development (Lee and D'Arcangelo, 2016). In  
22 consequence, the formation of layers is strongly compromised. In the somatosensory  
23 cortex, neurons destined to become part of a certain layer are almost uniformly  
24 dispersed across the cortex (Boyle et al., 2011; Dekimoto et al., 2010; Wagener et  
25 al., 2010). However, this perturbation seems to have little effect on properties of  
26 neurons and formation of functional circuits. Neurons retain their molecular fate as  
27 well as their electrophysiological properties (Guy et al., 2016; Silva et al., 1991;  
28 Wagener et al., 2010). The structure of synaptic boutons remains virtually unchanged  
29 (Prume et al., 2018, 2019). Areal boundaries within the cortex are preserved (Boyle  
30 et al., 2011). Moreover, whisker stimulation of reeler mice leads to the same  
31 hemodynamic responses in the cortex and activates the same cell types indicating a  
32 preservation of circuit modules comparable if not identical to a layered cortex (Guy et  
33 al., 2015; Wagener et al., 2016). For these reasons, the reeler mouse seems ideally

1 suited to study functional brain circuitries of defined cell types in the absence of  
2 layers.

3 We decided to focus on the connectivity of vasoactive intestinal polypeptide (VIP)  
4 expressing neurons. They constitute a major subgroup of GABAergic inhibitory  
5 neurons (Tremblay et al., 2016). There are several reasons why we chose this type  
6 of neuron. First, VIP neurons have a very distinct laminar distribution with about 60%  
7 occurring in LII/III, 20% in LIV and only very few cells in deep layers (Prönneke et al.,  
8 2015). So they are heavily biased towards upper layers. Second, VIP neurons have  
9 been suggested as major integrators of long-range input. They receive more inputs  
10 per cell than other inhibitory cell types (Wall et al., 2016). They are most strongly  
11 activated by cortical long-range input compared to pyramidal, somatostatin- and  
12 parvalbumin expressing neurons (Lee et al., 2013; Zhang et al., 2014). Because VIP  
13 cells strongly inhibit somatostatin cells (Walker et al., 2016), which themselves inhibit  
14 pyramidal cells (Zhou et al., 2020), it has been proposed that VIP neurons become  
15 activated by long-range input during active states, disinhibit pyramidal cells and  
16 thereby open a precisely timed window for integration and plasticity at excitatory  
17 synapses (Fu et al., 2014; Pfeffer et al., 2013; Williams and Holtmaat, 2019). Third,  
18 the input connectivity of VIP neurons is already well characterized across many  
19 cortical areas (Ährlund-Richter et al., 2019; Sun et al., 2019; Wall et al., 2016; Zhang  
20 et al., 2016). Finally, with the VIP-Cre line we can access these cells with high  
21 specificity having no contamination from other cell types (Prönneke et al., 2015;  
22 Taniguchi et al., 2011).

23 We first confirmed that VIP neurons lose their laminar bias in reeler mice,  
24 establishing this mouse as a valid model system to study the circuitry of VIP cells in  
25 the absence of layers. Then we generated maps of brain-wide long-range input to  
26 VIP neurons in the barrel cortex of wildtype (WT) and reeler mice, using rabies virus  
27 tracing. While we found that subcortical inputs innervated malpositioned VIP cells to  
28 the same extent as in a layered cortex, the balance of cortical inputs was  
29 fundamentally different. Ipsilateral cortical input was reduced, contralateral cortical  
30 input was increased compared to WT. Reeler mice had more callosal projecting  
31 neurons (CPNs) and hence a larger corpus callosum. We argue that the absence of  
32 layers has little effect on innervation by subcortical structures but induces a different  
33 circuit arrangement within the cortex.

## 1 MATERIAL AND METHODS

2

### 3 Experimental animals

4 We crossed the reeler line (B6C3Fe a/a-ReInrl/J, The Jackson Laboratory, Bar  
5 Harbor, USA) with the VIP-Cre line (VIPtm1(cre)Zjh, The Jackson Laboratory) to  
6 breed VIP-Cre/reeler mice heterozygous for reelin mutation and homozygous for Cre.  
7 These animals were crossed to generate VIP-Cre/reeler mice homozygous for reelin  
8 knockout. WT littermates or animals from the VIP-Cre line were used for comparison  
9 in tracing experiments. For control experiments to check the quality of our Cre-  
10 dependent constructs, we used C57BL/6J wildtype mice (The Jackson Laboratory).  
11 For tracing experiments not requiring Cre expression and for imaging we used WT  
12 and homozygous littermate pairs of the reeler line.

13 To visualize the population of VIP cells, we crossed the VIP-Cre/reeler line with the  
14 Ai9 tdTomato reporter line (B6.Cg-Gt(ROSA)26Sortm9(CAG-tdTomato)Hze/J, The  
15 Jackson Laboratory) to achieve tdTomato expression in VIP neurons.

16 Mice were housed in standard cages in a 12h light/dark cycle and with ad libitum  
17 access to food and water. All experimental procedures were performed in  
18 accordance with German laws on animal research (TierSchG und TierSchVersV  
19 2013). All tracing experiments were performed with 12-20 weeks-old mice of either  
20 gender.

21

### 22 Viral constructs

23 pAAV-DIO-TVA<sup>66T</sup>-EGFP-oG was generated based on the backbone of pAAV-hSyn-  
24 oG-EGFP-TVA-WPRE-hGpA (gift from Euseok Kim). The sequence for oG-EGFP  
25 was extracted using PCR with the primers F1-  
26 CTATACGAAGTTATGGTACCTTAGAGCCG; R1-  
27 GGATCCGGAGCTACTA ACTTCAGC. The sequence for TVA<sup>66T</sup> was extracted from  
28 pAAV-CAG-FLEX-TC<sup>66T</sup> ((Miyamichi et al., 2013), Addgene #48331) using PCR with  
29 primers F1-AGTAGCTCCGGATCCCCACCCCCCTTGGATGC; R1-  
30 CGGTAACGTGACCGGTAACGG. pAAV backbone was cut with restriction enzymes  
31 KpnI-HF and AgeI-HF to open the backbone and oG-EGFP fragment was reinserted

1 together with the TVA<sup>66T</sup> fragment using infusion cloning with an In-Fusion HD  
2 cloning kit (Takara bio). The plasmid was packaged into AAV8 by the SALK Viral  
3 Vector Core, from where it is available.

4 For RV-tracing experiments, 100-200 nl of AAV8-DIO-TVA<sup>66T</sup>-EGFP-oG was injected  
5 at a titer of  $1.6 \times 10^{13}$  IU/ml. RV-SADΔG-mCherry (EnvA) was injected at the same  
6 location fourteen days later at a titer of  $1 \times 10^7$  IU/ml. Animals were sacrificed seven  
7 days later. For non-transsynaptic tracing experiments 150 nl of AAV-retrograde-  
8 hSyn-EGFP (Addgene, #50465) at a titer of  $2-4 \times 10^{12}$  IU/ml was used. Animals were  
9 sacrificed after fourteen days.

10

### 11 Surgery and viral injection

12 For viral tracing experiments, mice underwent intrinsic signal optical imaging to  
13 localize the whisker C2 related cortical column. The injection pipette was inserted at  
14 this location in WT and reeler animals. The surgery was performed as in (Hafner et  
15 al., 2019).

16 For sedation and analgesia, mice were injected intraperitoneally with 10 µg/g  
17 xylazine (Xylarium, Ecuphar) and 0.065 µg/g buprenorphine (Temgesic, Individor UK  
18 Limited) in sterile saline, respectively. Anesthesia was induced with 3% isoflurane  
19 (vol/vol) and maintained between 0.5 and 1% throughout the entire surgical  
20 procedure (Harvard Apparatus, USA). Mice were mounted on a custom-built frame  
21 with rigid earbars. A mixture of 2µg/g bupivacaine/lidocaine (Astra Zeneca) was  
22 injected subcutaneously under the scalp for local anesthesia. A heating pad was  
23 used to maintain body temperature at 37 °C (ATC 1000, World Precision  
24 Instruments, Florida). Subsequently, a small incision was made in the scalp to  
25 expose the right hemisphere of the skull. The bone over the somatosensory area was  
26 thinned to transparency with a dental drill (OS-40, Osada Electric Company, Japan).  
27 Then, the location of the C2 whisker-related column was determined and mapped on  
28 the blood vessel pattern as described below. The bone above the target area was  
29 removed with a syringe tip. A glass pipette cut to 20 µm tip diameter (Drummond  
30 Scientific Co, USA) was front-filled with AAV helper virus. The pipette holder was  
31 attached to a micromanipulator (Luigs & Neumann, Germany). The pipette was  
32 inserted at the target location into the brain in an approximately 45° angle, orthogonal

1 to the curvature of the cortex. AAV was pressure-injected with a syringe at three  
2 depths (750  $\mu\text{m}$ , 500  $\mu\text{m}$ , and 250  $\mu\text{m}$  below pia). To reduce backflow, the needle  
3 was left in place at each depth for at least three minutes. The scalp was sutured and  
4 the mouse received a subcutaneous injection of 5  $\mu\text{g/g}$  Carprofen (Pfizer) for  
5 prolonged pain relief. Fourteen days later, the mouse was injected with RV-mCherry  
6 without prior imaging. The injection was guided based on the blood vessel pattern  
7 and landmarks from the previous surgery.”

8

### 9 Intrinsic signal optical imaging

10 This procedure was performed as described earlier (Guy et al., 2015; Hafner et al.,  
11 2019). Briefly, Whisker C2 on the left muzzle was stimulated with a piezo actuator at  
12 5Hz. Red light was shone on the cortex exposed, thinned cortex above the right  
13 barrel field and its reflectance was measured with a CCD camera. Changes in  
14 reflectance were average across 30 trials. The blood vessel pattern and the intrinsic  
15 signal were overlaid to guide the subsequent injection.

16

### 17 Fixation and tissue sectioning

18 Mice were sacrificed by injecting an overdose of ketamine (100  $\mu\text{g/g}$ ; Medistar) and  
19 perfused transcardially with ice-cold 10% sucrose solution followed by 4%  
20 paraformaldehyde (PFA) in 0.1M phosphate buffer. The brain was postfixed in 4%  
21 PFA for 4h. A vibratome (VT 1200 S, Leica) was used to section the brain into 100  
22  $\mu\text{m}$ -thick coronal sections rostral and caudal to barrel cortex, while barrel cortex was  
23 sectioned at 50  $\mu\text{m}$ -thick intervals. Sections spanning the barrel cortex were  
24 subjected to immunohistochemistry while all other sections were stained for 4',6-  
25 diamidino-2-phenylindole (DAPI) only.

26

### 27 Immunohistochemistry

28 Barrel cortex sections were washed in TRIS buffer (TB) 1x15 min, TRIS-buffered  
29 saline (TBS) 1x15 min and TBS + 0.5% Triton X-100 (TBST) 2x15 min, all at pH 7.6.  
30 For blocking, sections were incubated 90 min at room temperature in 0.25% bovine  
31 serum albumin/10% goat serum/TBST (Jackson Immuno Research). For primary

1 antibody labeling, sections were incubated 48-72 h at 4°C with (i) chicken anti-GFP  
2 (Aves) diluted 1:500, (ii) mouse anti-RFP (Rockland) diluted 1:2000. Sections were  
3 washed 4x15 min with TBST. For secondary antibody labeling, sections were  
4 incubated 4h at room temperature with (i) Alexa Fluor 488-conjugated goat anti-  
5 chicken IgG (Molecular Probes), (ii) Alexa Fluor 568-conjugated goat anti-mouse  
6 IgG2a (Molecular Probes) diluted 1:500 in TBST. In some cases, sections were  
7 stained in addition with primary antibody guinea pig anti-vGluT2 (Millipore) diluted  
8 1:2000 and secondary antibody Alexa Fluor 633-conjugated goat anti-guinea pig  
9 (Molecular probes) diluted 1:500. After washing 2x15 min with TBST and 1x15 min  
10 with TBS, sections were stained with DAPI, diluted 1:1000 in TBS. After several  
11 washes in TB, sections were mounted in Aqua-Poly-Mount (Polysciences).

12

### 13 Fluorescent *in-situ* hybridization

14 Sections of the VIPCre/Reeler/tdTomato mouse were stained with a riboprobe  
15 against VIP RNA. VIP riboprobe was generated as described earlier (Prönneke et al.,  
16 2015) using the following primers FP: CCTGGCA TTCCTGATACTCTTC; RP:  
17 ATTCTCTGATTTTCAGCTCTGCC (527 bp; Allen Brain Atlas Riboprobe ID:  
18 RP\_070116\_02\_E09). The staining procedure was performed exactly as in (Prönneke  
19 et al., 2015). The tdTomato signal was amplified after the in-situ hybridization using  
20 the immunohistochemistry protocol described above but without Triton X-100.  
21 Primary antibody rabbit anti-RFP (Rockland) was combined with secondary antibody  
22 Alexa Fluor 594-conjugated goat anti-rabbit (Molecular probes).

23

### 24 Image acquisition and processing

25 Images were acquired on an inverted epifluorescence slide-scanning microscope  
26 (Axio Observer, Zeiss) with a 10x objective (NA=0.3) or on 25x objective (NA=0.8).  
27 For overview images only one plane was imaged, for the injection sites stacks were  
28 acquired. Tiles were stitched after imaging and stacks were deconvoluted in ZEN  
29 Blue software (Zeiss) to reduce out-of-focus light. Confocal acquisitions were taken  
30 on a LSM 880 (Zeiss) with a 25x objective operated by ZEN black software (Zeiss).

31



## 1 Magnetic resonance imaging (MRI) data acquisition and preprocessing

2 The *ex vivo* brain samples (n=3 per group) were imaged in a high-field 9.4 Tesla MR  
3 system, using a mouse brain 4-channel coil array (Bruker BioSpin MRI GmbH,  
4 Ettlingen, Germany). The scanning protocol included Magnetization Transfer (MT)  
5 weighted images and diffusion-weighted images. For MT, a 3D Fast Low Angle Shot  
6 (FLASH) sequence was used to acquire three datasets: MT-weighted, Proton-  
7 Density-weighted, and T<sub>1</sub>-weighted (repetition time 15 ms, echo time 3.2 ms, flip  
8 angles [5°, 5°, 25°], 10 averages, voxel size 125 x 125 x 125 μm<sup>3</sup>). These datasets  
9 were used to estimate MT saturation (MTsat) according to the method described by  
10 Helms *et al* (Helms et al., 2008). Diffusion-weighted images were acquired using a  
11 Stejskal-Tanner pulsed gradient spin-echo sequence (repetition time 2000 ms, echo  
12 time 23.2 ms, 20 slices, 3 averages, voxel size 125 x 125 x 500 μm<sup>3</sup>, b values 3000  
13 and 6000 s/mm<sup>2</sup>, 30 directions each, 5 b<sub>0</sub> images). The diffusion data were  
14 preprocessed through denoising (Veraart et al., 2016), correction for eddy current  
15 distortions (Andersson and Sotiropoulos, 2016), motion correction (Avants et al.,  
16 2011), and bias field correction (Tustison et al., 2010). A Diffusion Tensor model  
17 (Basser et al., 1994) was fitted to the preprocessed data and fractional anisotropy  
18 (FA) was derived (Garyfallidis et al., 2014). An RGB color-coded FA map was also  
19 computed. To ensure that all images were centered at a common origin and oriented  
20 in the same way, we registered the individual mouse brains to the digital template of  
21 the Allen Mouse Brain Common Coordinate Framework version 3 (Lein et al., 2007).  
22 The registration employed six degrees of freedom (three translations and three  
23 rotations) to maximize the mutual information between each individual brain and the  
24 template (Avants et al., 2011). Since this constitutes a rigid-body transform, the  
25 original volumes of the structures were preserved.

26

## 27 Corpus callosum (CC) and isocortex segmentation

28 To measure the cross-sectional area of the CC at its midline crossing in a consistent  
29 way across animals, we followed a multi-step process involving the computed maps  
30 for MTsat and RGB FA. The MTsat maps, which exhibit good grey/white matter  
31 contrast, were used to generate white matter masks through simple thresholding  
32 (voxels with MTsat > 0.006 were classified as white matter). We subsequently

1 restricted the white matter masks to the five middle sagittal slices (left-to-right  
2 thickness 0.625 mm) and further cropped them along the rostrocaudal (5 mm) and  
3 the dorsoventral (3.125 mm) directions—thus confining them within a thin midline  
4 slab that contained the entire CC crossing. This slab also included several other  
5 white matter tracts, some of which (e.g. dorsal fornix) run adjacent to the CC and are  
6 challenging to separate based on MTsat alone. We addressed this issue by  
7 incorporating information about the orientation of white matter tracts. This was  
8 available in the form of the RGB FA map, which is a color-coded representation of  
9 the principal diffusion direction at each voxel (Pajevic and Pierpaoli, 1999). Using  
10 ITK-SNAP (Yushkevich et al., 2006), we overlaid the RGB FA map on the MTsat  
11 image, and segmented the CC manually, excluding voxels with principal diffusion  
12 directions other than left-to-right. In reeler mutants, this step proved especially useful  
13 for excluding a midline tract with a rostrocaudal orientation, running dorsal to the CC.  
14 Using the final CC mask, we computed its midline cross-sectional area by multiplying  
15 the number of CC voxels on the midsagittal slice with the 2D area of each voxel  
16 ( $0.125 \times 0.125 \text{ mm}^2$ ).

17 The isocortical volume was derived from MTsat images, with the help of the Allen  
18 Brain Atlas. First we pooled all isocortical regions of the atlas into a single mask and  
19 overlaid it on each individual MTsat image using ITK-SNAP. Then we manually  
20 edited the mask for each brain, until it covered the entire cortical thickness, without  
21 protruding into extra-cortical areas. The final isocortical volume was computed by  
22 multiplying the number of voxels in the edited mask with the 3D volume of each voxel  
23 ( $0.125 \times 0.125 \times 0.125 \text{ mm}^3$ ).

24

## 25 Quantification and statistical analysis

26 Mapping of RV-labeled input cells was done by overlaying the tissue section with the  
27 corresponding section of the Allen Brain Atlas ([http://mouse.brain-](http://mouse.brain-map.org/experiment/thumbnails/100048576?image_type=atlasand)  
28 [map.org/experiment/thumbnails/100048576?image\\_type=atlasand](http://mouse.brain-map.org/experiment/thumbnails/100048576?image_type=atlasand)). Labeled cells on  
29 all sections spanning from Bregma +3 to -4.5 mm were counted manually in  
30 NeuroLucida (MBF Bioscience). Cell counts in an area were either normalized by the  
31 total number of starter cells (input magnitude) or by the total number of inputs cells  
32 (input fraction).

1 For quantification of contralateral input labeled with AAV-retro-EGFP, we manually  
2 counted all EGFP-positive cells in contralateral barrel cortex on sections from  
3 Bregma -0.8 to -2.1 mm as well as all cells in a volume from pia to white matter with a  
4 200  $\mu\text{m}$  diameter around the injection site. Contralateral neurons were then divided  
5 by the number of cells at the injection site as normalization to control for different  
6 labeling intensities.

7 For quantification of VIP neurons in VIP-Cre/tdTomato mice, neurons were manually  
8 counted on six sections per mouse on a patch of barrel cortex that spanned from pia  
9 to white matter and was 1000  $\mu\text{m}$  wide. In the occasional case a section was lost  
10 during the tissue preparation, we interpolated for this animal the number of cells to  
11 the same volume.

12 For a layer-independent analysis of neuronal distribution in the cortex, we divided the  
13 space between the pia and the white matter boarder in 20 bins of equal size. We  
14 counted the number of labeled cells in each of these bins and normalized them by  
15 the total count of cells in all bins. Cell counts were exported with NeuroLucida  
16 Explorer to Excel. R software ([www.R-project.org](http://www.R-project.org)) was used to sort data and perform  
17 statistical test with custom-written code. For pairwise comparisons between WT and  
18 reeler mice, data were first tested for normality (Shapiro–Wilk test) and equal  
19 variance (Barlett test). For normally distributed data with equal variances, we used  
20 the Student’s t-test. For non-normally distributed data, we used the Wilcoxon rank-  
21 sum test. For normally distributed data with unequal variances, we used the Welch’s  
22 t-test. For multiple comparisons, we used the alpha-error adjustment by Holm. All  
23 values are given as mean  $\pm$  SD. Graphs were produced using Origin software (Origin  
24 Lab, USA). Adobe Illustrator and InDesign CS6 were used for arrangement of  
25 pictures.

## 1 RESULTS

2

### 3 **VIP neurons are uniformly distributed across the cortex in reeler mice**

4 It is known from previous studies in reeler mice that parvalbumin- (Boyle et al., 2011)  
5 and somatostatin-positive (Yabut et al., 2007) neurons lose their typical laminar  
6 distribution but VIP neurons have not been investigated yet. We generated VIP-  
7 Cre/tdTomato/reeler mice to visualize VIP neurons (Figure 1A, A'). While in WT they  
8 showed their typical bias towards the upper layers, in reeler mice VIP neurons  
9 appeared homogenously distributed throughout the thickness of the cortex (Figure  
10 1B, B', Figure S1A). The number of VIP cells in barrel cortex stayed approximately  
11 the same (Figure S1B). To check if Cre-expressing tdTomato cells are VIP  
12 expressing, we stained sections of reeler barrel cortex against VIP-RNA with in-situ  
13 hybridization. We found that  $99.4 \pm 0.8\%$  of tdTomato cells expressed VIP (n=3 mice,  
14 3 sections each; Figure S1C). This is the same level of specificity demonstrated for  
15 the VIP-Cre/tdTomato/WT mouse (Prönneke et al., 2015). In sum, VIP neurons in the  
16 reeler mouse retain their VIP expression, appear in equal numbers as in WT but  
17 show no laminar bias. Hereafter we used the VIP-Cre/reeler mouse to specifically  
18 target VIP neurons and investigate if their altered distribution affects their ability to  
19 integrate long-range inputs.

20

### 21 **Rabies virus tracing for mapping of brain-wide inputs to VIP neurons**

22 We used Cre-dependent rabies virus tracing, in order to map the monosynaptic long-  
23 range inputs to VIP cells in barrel cortex of WT and reeler mice (Wickersham *et al.*,  
24 2007; Wall *et al.*, 2016; Figure 2). We injected AAV8-DIO-TVA<sup>66T</sup>-EGFP-oG  
25 (hereafter AAV-TVA<sup>66T</sup>-EGFP-oG) into the cortex of VIP-Cre mice having WT or  
26 reeler genotypes. This lead to the expression of three proteins: the cell surface  
27 receptor TVA (here we used a mutated version, TVA<sup>66T</sup> (Miyamichi et al., 2013)), the  
28 optimized version of the rabies glycoprotein (oG; Kim *et al.*, 2016) and EGFP (Figure  
29 2A). Modified rabies virus RV-SADΔG-mCherry (EnvA) (hereafter RV-mCherry;  
30 Figure 2A) was injected two weeks later at the same location. Because it is coated  
31 with the EnvA-ligand TVA, it can only transduce cells presenting TVA on their  
32 surface. Furthermore, RV-mCherry is G-deleted, so that it needs the glycoprotein

1 provided in *trans* from the AAV to spread to presynaptic neurons. Its mCherry  
2 expression labels these presynaptic neurons red. The starter cells appear yellow due  
3 to the mixture of EGFP and mCherry (Figure 2B). This two-virus system allows the  
4 visualization of brain-wide monosynaptic inputs to unequivocally identifiable starter  
5 cells.

6 To check if our viruses are specific, we performed control experiments in BL6  
7 animals without Cre. Injection of RV-mCherry alone did not result in any labeling,  
8 showing that TVA is required for RV entry into cells (Figure S1A). When we injected  
9 AAV-TVA<sup>66T</sup>-EGFP-oG and RV-mCherry as in tracing experiments, we did not detect  
10 any RV-mCherry labeling, neither at the injection site nor in the thalamus (Figure  
11 S1B). A few EGFP-positive cells most likely resulted from a minimal Cre-independent  
12 expression of the AAV construct. While RV requires very little TVA to enter cells,  
13 which can result in Cre-independent leak expression, TVA<sup>66T</sup> has lower affinity to RV  
14 and thus needs to be expressed in much higher levels (Miyamichi et al., 2013).  
15 Therefore, this receptor abolishes leak expression and each mCherry-positive neuron  
16 can be surely considered an input neuron.

17

## 18 **Injections were centered on the whisker C2 representation**

19 In the barrel cortex, each whisker is represented by a cortical column. Although the  
20 reeler barrel cortex has no laminar organization, it retains a somatotopic organization  
21 such that adjacent whiskers are represented by adjacent modules (Guy et al., 2015).  
22 We localized the cortical whisker C2 representation to guide our injections using  
23 intrinsic signal optical imaging (Grinvald et al., 1986; Guy et al., 2015). Repetitive  
24 single-whisker C2 stimulation elicited hemodynamic responses, which appeared  
25 similar among WT and reeler mice (Figure S2A, C). The overlay of the signal with the  
26 blood vessel pattern on the cortical surface (Figure S2B, D) provided a map to  
27 accurately target the whisker-related cortical module with an injection (Hafner et al.,  
28 2019). As a proof of principle, we injected AAV-TVA<sup>66T</sup>-EGFP-oG and RV-mCherry  
29 centered on C2 in a WT animal and sectioned the cortex tangentially. We could  
30 confirm our target specificity as the highest density of inputs was present within C2  
31 (Figure S2E). In this way we could target VIP neurons that belong to the same  
32 functional modules in WT and reeler mice to have optimal comparability between  
33 genotypes.

1

## 2 **VIP starter cells in reeler did not show a laminar bias**

3 VIP-Cre and VIP-Cre/reeler mice (n = 7 each group) were injected with AAV-TVA<sup>66T</sup>-  
4 EGFP-oG and two weeks later with RV-mCherry into the right barrel cortex. Cells  
5 double-labeled with EGFP/mCherry were considered starter cells and counted on  
6 each section where they appeared (Figure 2C-F). To visualize the distribution of  
7 starter cells in the two genotypes, we divided the cortex in 20 equal-sized bins and  
8 calculated the proportion of starter cells in each bin relative to the total number of  
9 starter cells (Figure 2G). The starter cell distribution matched the general distribution  
10 of VIP cells in both genotypes. While in WT there was a clear bias of starter cells  
11 towards the upper third of the cortex, the distribution of starter cells in reeler was  
12 broader with the majority of cells in the middle part of the cortex. On average there  
13 was a higher number of starter cells in reeler (Figure 2H; mean WT: 158.3±58.3;  
14 mean reeler: 240.9±158.1; Wilcoxon rank sum test, W=30, p= 0.54). This difference  
15 could arise because brain tissue in reeler might absorb virus solution better. The  
16 potential confounder of such a bias is addressed below.

17

## 18 **VIP cells received input from the same areas in WT and reeler**

19 To address the question if the absence of layers impacts the capacity of VIP cells to  
20 receive proper long-range inputs, we manually counted all RV-labeled cells in the  
21 entire brain but omitted cells in the barrel cortex itself because of their extreme  
22 abundance. Therefore, local connectivity of VIP neurons was not assessed. Each  
23 coronal section was overlaid with the corresponding atlas section of the Allen Brain  
24 atlas. RV-mCherry-positive cells were assigned to an area, based on the outlines of  
25 the atlas and the cytoarchitectonic features discernable with nuclear stain.

26 VIP neurons in reeler mice received input from the very same areas as WT mice with  
27 no exception. Examples for areas in which we found transynaptically labeled cells are  
28 presented in Figure 3. Secondary somatosensory cortex contributed the highest  
29 number of input cells in WT and reeler (Figure 3B, B'). In some areas morphological  
30 differences of input cells became salient, for example in motor cortex where somata  
31 appeared larger (Figure 3A, A'). Quantitative differences were easily noticeable in  
32 contralateral barrel cortex, which contained more cells in reeler (Figure 3C, C') and

1 primary auditory cortex, which contained fewer cells in reeler compared to WT  
2 (Figure 3D, D'). Thalamic inputs appeared very similar (Figure 3E, E'). In visual  
3 cortex the distribution of projection neurons was clearly different with inputs in WT  
4 located at the LIII/IV border but being more dispersed in reeler (Figure 3F, F'). From  
5 these observations we suspected that the absence of layers could affect most  
6 strongly the magnitude and the proportion of inputs to VIP cells.

7

### 8 **VIP cells in reeler displayed an imbalance between ipsi- and contralateral input**

9 When analyzing quantitative differences in the inputs between genotypes, we first  
10 focused on more global categories of input (Figure 4, Table S1). We first summed up  
11 all long-range inputs and then separated inputs from ipsilateral and contralateral  
12 cortical areas, from the thalamus and from all subcortical areas. We normalized the  
13 inputs by dividing the cell count by the number of starter cells to calculate the input  
14 magnitude, which can be seen as a proxy for the strength of an input. VIP neurons in  
15 reeler received overall fewer inputs per cell. This reduction was exclusively due to  
16 fewer inputs from the ipsilateral cortex in reeler, while they received more  
17 contralateral inputs per cell. There was no difference for thalamic or total subcortical  
18 input.

19 The input magnitude might be influenced by the number of starter cells. One  
20 presynaptic neuron could synapse on multiple starter cells. This divergent  
21 connectivity prompts that with a rising number of starter cells, the count of  
22 additionally labeled postsynaptic cells would decrease. Hence, the higher the number  
23 of starter cells, the lower the ratio of starter cells to input cells (input magnitude). The  
24 smaller overall input magnitude in reeler might result from this group having on  
25 average more starter cells. To investigate this relationship we plotted the number of  
26 starter cells against the input magnitude for the two genotypes (Figure S2C). For both  
27 genotypes the slope was close to zero (WT: Input magnitude =  $0.002 \times \text{starter cells} + 33.9$ ,  $R^2 = 0.2$ ; reeler: Input magnitude =  $-0.002 \times \text{starter cells} + 22.2$ ,  $R^2 = -0.2$ ). In  
28 consequence, there was no relationship between the number of starter cells and the  
29 input magnitude, and hence the higher number of starter cells in reeler cannot  
30 explain the lower input magnitude.  
31

1 In sum, VIP neurons in reeler mice are embedded in a different long-range cortical  
2 circuitry that contains fewer inputs from the ipsilateral and more inputs from the  
3 contralateral cortical hemisphere.

4

### 5 **Auditory and motor cortex showed the strongest reduction in ipsilateral input**

6 Because each VIP neuron in reeler received on average less input, the subsequent  
7 analyses for differences among individual areas using the input magnitude would be  
8 inherently biased. Therefore, we employed another means of normalization: input  
9 fraction. It is the number of inputs in an area divided by the number of total inputs in  
10 the brain. It reflects how different inputs are balanced. We selected 41 consistently  
11 labeled areas that constituted the majority of inputs (97.6% in WT; 98.8% in reeler).  
12 We calculated the input fraction for each area and made pairwise comparisons  
13 between genotypes (Figure 5, Table S2). For motor, somatosensory body region,  
14 auditory and visual cortex we also summed up counts in the individual sub-areas to  
15 calculate a total input fraction. VIP neurons in reeler mice received a notably lower  
16 fraction from almost all ipsilateral cortical areas. The strongest reduction was seen for  
17 primary auditory cortex. The input fraction for motor cortex was also significantly  
18 reduced. The contralateral barrel cortex as well as the contralateral secondary  
19 somatosensory cortex contributed a significantly higher fraction of inputs in reeler.  
20 Subcortical input fraction was fairly similar and only the ventral posterolateral nucleus  
21 of the thalamus constituted a higher fraction of inputs in reeler. This analysis of the  
22 fraction of inputs validates that the proportion of inputs from the ipsilateral  
23 hemisphere is reduced and from the contralateral homotopic area increased.

24

### 25 **Reeler mice had a larger corpus callosum**

26 The fact that VIP cells in reeler received more input from the contralateral  
27 somatosensory cortex prompted the question if there are more callosal projection  
28 neurons (CPNs) in reeler. We injected the retrograde tracer AAV-retro-EGFP (Tervo  
29 et al., 2016) into the right barrel cortex of WT and reeler mice and counted the CPNs  
30 in the other hemisphere (Figure S4A, A'). We normalized the count of CPNs by the  
31 number of labeled cells in a given volume at the injection site. In reeler there was  
32 about a 3-fold increase in the average number of CPNs (Figure S4C). This increase



1 was the same as for contralateral inputs to VIP cells. Moreover, the distribution of  
2 CPNs was very similar to the contralateral inputs' to VIP cells, being more biased  
3 towards the lower part of the cortex (Figure S4D, Figure 6F).

4

5 If there are more CPNs in reeler, the corpus callosum should also contain more fibers  
6 and hence be larger. To provide additional evidence for an increased callosal  
7 connectivity, we performed magnetic resonance imaging (MRI) to measure the  
8 dimensions of the corpus callosum. We performed a quantitative morphometric  
9 analysis on three WT-reeler littermate pairs. We segmented the corpus callosum  
10 based on structural information of magnetization transfer maps (Figure S5A, A') and  
11 directional information of fractional anisotropy maps (Figure S5C, C'). We measured  
12 the area of the corpus callosum on the mid-sagittal section, which was larger in reeler  
13 in every littermate pair (Figure S5D). This effect was not generated by differences in  
14 cortical volume as the volume of the isocortex was fairly well matched between  
15 littermates, although in one pair the volume was slightly larger in the reeler mouse  
16 (Figure S5E). Furthermore, we noticed on coronal sections that the corpus callosum  
17 was shaped differently in reeler. It did not have a typical U-shape at the medial area  
18 but was flattened out (Figure S5B, B'). These experiments indicate that reeler mice  
19 have a larger corpus callosum because of a surplus of CPNs sending an axon to the  
20 other hemisphere.

21

## 22 **Ipsilateral projection neurons were distributed similarly but CPNs differently**

23 In reeler mice, the whole cortex shows alterations because of reelin deficiency.  
24 Therefore, the presynaptic projection neurons labeled in our study should show a  
25 markedly different distribution than in WT. To investigate the pattern of dispersion, we  
26 divided the cortex into 20 equal-sized bins and counted the proportion of presynaptic  
27 cells in each bin for ipsilateral motor, primary visual, primary auditory, somatosensory  
28 body (trunk+limbs) and secondary somatosensory cortex as well as for contralateral  
29 barrel cortex (Figure 6). In most ipsilateral areas, projection neurons in reeler mice  
30 had a very similar distribution across the cortical depth compared to WT but slightly  
31 shifted towards the pial surface (Figure 6A-D). Only in visual cortex the distribution  
32 looked notably different. In WT, most projection neurons were located around the LIII-

1 IV border. This peak was smoothed out in reeler, indicating that the projection  
2 neurons were rather dispersed than inverted in their arrangement (Figure 6E). The  
3 pattern of projection neurons in the contralateral barrel cortex, however, was  
4 completely different (Figure 6F). In WT, projection neurons were predominantly  
5 located in the upper third of the cortex, corresponding to LII/III. In reeler, projection  
6 neurons were predominantly located in the lower two-thirds of the cortex.

## 1 **DISCUSSION**

2

3 The main aim of this study was to investigate if the distribution of cortical cells across  
4 layers is linked to their capacity to integrate long-range inputs. We investigated the  
5 long-range inputs to VIP neurons because they have a very typical laminar bias  
6 towards the upper layers, which is lost in reeler mice. Using retrograde RV-tracing we  
7 mapped the brain-wide inputs to VIP neurons in barrel cortex of WT and reeler mice.  
8 There was no difference in the innervation by subcortical inputs. Cortical inputs were  
9 from the same sources, however, in reeler ipsilateral cortical inputs were reduced  
10 and contralateral cortical inputs were much more numerous, revealing a different  
11 cortical circuit architecture in the absence of layers.

12

### 13 **Input to VIP cells originated from the same sources in WT and reeler**

14 We found that VIP cells in the barrel cortex of WT and reeler mice were innervated by  
15 the same sources in both genotypes. This is not surprising because the existence of  
16 the same types of projection neurons has been confirmed in reeler, although in cortex  
17 they are in ectopic positions (Caviness, 1976; Diodato et al., 2016; Imai et al., 2012;  
18 Steindler and Colwell, 1976; Wagener et al., 2016; Yoshihara et al., 2010). Numerous  
19 tracing studies of cortical neurons in WT mice, including excitatory (DeNardo et al.,  
20 2015) and inhibitory (Wall et al., 2016) neurons in barrel cortex, demonstrated that all  
21 neuron classes in a cortical area receive input from the same sources. Therefore, the  
22 feature, which is considered to distinguish cell types and relate to potential functional  
23 implications, is the input's proportion a given neuron type receives. In consequence,  
24 we expected to discover putative differences in the afferent connectivity to VIP  
25 neurons between genotypes specifically on a quantitative level, which has not been  
26 assessed for long-range projections in reeler yet.

27

### 28 **Subcortical fibers target VIP cells independent of laminar position**

29 When we looked at the proportion of inputs to VIP cells, we found profound  
30 differences between WT and reeler. VIP cells in reeler received less input per cell  
31 than in WT, which was exclusively due to a reduction in cortical inputs, while the  
32 subcortical inputs remained the same.

1 The thalamic input comprised the main source of subcortical input. The cells in the  
2 thalamus are at most only subtly affected by the reelin mutation (Lambert de Rouvroit  
3 and Goffinet, 1998; Wagener et al., 2010). Previous studies have shown that  
4 thalamic fibers from the VPM reach their malpositioned postsynaptic targets in the  
5 reeler cortex although they take an unusual trajectory, reaching LI before bouncing  
6 back to plunge down on the target cells (Harsan et al., 2013; Molnár et al., 1998;  
7 Wagener et al., 2016). Together with our results, these studies support the idea that  
8 fibers from properly developed subcortical structures find their ectopic targets in the  
9 mislaminated reeler cortex in approximately the same numbers. In consequence, the  
10 laminar distribution of VIP cells seems not to be linked to their capacity to integrate  
11 subcortical long-range inputs.

12

### 13 **Reeler mice have increased callosal connectivity**

14 In the reeler cortex, both the VIP cells as well as their cortical presynaptic partners  
15 are malpositioned. In this case, we found the circuit organization to be different. The  
16 average number of ipsilateral long-range projection neurons converging on a VIP cell  
17 was significantly lower than in WT. Especially the proportion of inputs from motor and  
18 auditory cortex to VIP cells in barrel cortex was strongly reduced.

19 In parallel to the reduction of ipsilateral cortical input, there was a massive increase  
20 of afferents from the contralateral hemisphere. We showed that in reeler there are  
21 more CPNs connecting the hemispheres of barrel cortex and as a result the corpus  
22 callosum is larger. Although previous studies have investigated the macroanatomy  
23 and trajectory of fiber bundles in the reeler mouse (Badea et al., 2007; Harsan et al.,  
24 2013), the enlargement of the corpus callosum has remained unnoticed. Similarly,  
25 earlier tracing studies have just confirmed the existence of callosal connections  
26 between homotopic areas but did not assess the numbers of CPNs (Caviness and  
27 Yorke, 1976; Imai et al., 2012; Steindler and Colwell, 1976). At least, our observation  
28 that the distribution of CPNs is biased towards deeper parts of the cortex is not  
29 without precedent (Steindler and Colwell, 1976).

30

### 31 **Different mechanisms might drive the formation of ipsi- and contralateral** 32 **projections**

1 Because ipsi- and contralateral long-range inputs showed such an opposing change  
2 in innervation intensity, we speculate that these two types of connections mature at  
3 different time points and based on different mechanisms. A sizeable fraction of  
4 ipsilateral projection neurons in reeler either fail to grow an axon or grow an axon but  
5 fail to find their destined postsynaptic partner. There is subtle evidence that ipsilateral  
6 projection neurons do not form excess projections that are pruned away but have a  
7 directed outgrowth and their connections are stably established by postnatal day (P)7  
8 (Klingler et al., 2018). On the contrary, during the development of callosal projections  
9 a transiently higher number of callosal axons is reduced in an activity-dependent  
10 process of axonal elimination (rev. in (Innocenti and Price, 2005)). In the  
11 somatosensory system, CPNs invade the contralateral cortex by P5, reach their  
12 maximum density by P10 and then reduce again to reach a stable level of innervation  
13 by P20 (Fenlon et al., 2017; De Leon Reyes et al., 2019). Because the establishment  
14 of permanent callosal synapses is only finished in the third postnatal week, they  
15 might mature based on the network activity generated by already existing ipsilateral  
16 connections (Petreanu et al., 2007; Suárez et al., 2014). Perhaps in reeler, the  
17 pruning of callosal axons happens to a lesser degree than in WT to maintain a stable  
18 network in which the inputs of multiple afferent systems are balanced (Caviness and  
19 Rakic, 1978).

20 Another possibility would be that the absence of reelin impacts signaling pathways for  
21 axonal outgrowth. For example, *Sema3a* is a signaling molecule involved in axonal  
22 guidance that acts as a repulsive cue for axons (Polleux et al., 1998). Knock-out of  
23 the *sema3a* receptor causes an increase in contralateral axon projections (Wu et al.,  
24 2014). *Sema3a* and reelin pathways could intersect at the Fyn kinase, which appears  
25 in the intracellular signaling cascade of both factors (Lee and D’Arcangelo, 2016;  
26 Sasaki et al., 2002). Indeed, Fyn deficiency causes a higher maintenance rate of  
27 growth cones (Sasaki et al., 2002) and knock-out mice show a lamination defect (Kuo  
28 et al., 2005). Perhaps the absence of reelin collapses the synergy of these two  
29 pathways and leaves more callosal axons intact.

30

31

32 **An alternative circuit to retain cognitive abilities**

1 Despite the absence of layers, reeler mice display no severe decline in cognitive  
2 abilities, have largely preserved sensory function, and only have a slight impairment  
3 of spatial memory and executive function (Imai et al., 2017; Pielecka-Fortuna et al.,  
4 2015; Salinger et al., 2003; Wagener et al., 2010). So far this preservation of  
5 cognitive abilities has been attributed to the fact that in reeler neurons seem not only  
6 to retain their physiological properties but also their connectivity, implying the  
7 formation of the same circuits despite the malposition of its parts (Guy and Staiger,  
8 2017). However, our map of brain-wide inputs to VIP neurons reveals that reeler mice  
9 have a different proportion of ipsi- and contralateral input. We argue that this change  
10 in connectivity might emerge as a plastic adaption in pursuit of retaining global  
11 cognitive abilities like sensory perception but perhaps fails to realize more specialized  
12 and challenging domains of cognition. Because our connectivity map contains  
13 information on the number of connections, it allows to make very specific  
14 assumptions about behavioral impacts. For example, the auditory cortex fuels  
15 information about sound to the somatosensory cortex to be integrated into tactile  
16 processing (Lemus et al., 2010; Maruyama and Komai, 2018). This input pathway  
17 comprises much fewer neurons in reeler. Behavioral experiments compelling reeler  
18 mice to integration of sound into tactile perception might be a starting point to study  
19 the functional significance of a diminished input. Similarly, the increased callosal  
20 connectivity might hint that reeler mice rely more on bilateral information during their  
21 sensory exploration. This could be tested perhaps in a variation of a corridor tracking  
22 task adapted for reeler to exclude influence of motor deficits (Sofroniew et al., 2015).

23

24 In conclusion, we incline to the viewpoint that layers are important for the formation of  
25 the mouse cortical network as we know it, maybe providing the guidance for pre- and  
26 postsynaptic partners to meet across long distances. However, there are plastic  
27 mechanisms independent of neuronal position allowing alternative circuits to form  
28 that enable basic cognition. Looking across species, intelligence presents itself in  
29 various connectivity schemes. The analogue to the mammalian cerebral cortex in  
30 birds is the pallium, which is organized in nuclei (Butler and Cotterill, 2006). The  
31 analogue in cephalopods is the vertical lobe, which is organized in serial matrices  
32 (Shigeno et al., 2018). Both taxa evolved species with baffling cognitive abilities  
33 rivaling mammalian intelligence (Roth, 2015). There is even strong evidence that in

- 1 the bird pallium neurons express the same molecular markers and assemble the
- 2 same microcircuits found in mammals despite their different arrangement (Calabrese
- 3 and Woolley, 2015; Dugas-Ford et al., 2012). Looking at different wiring approaches
- 4 will benefit our understanding of the essential features neuronal circuits require to
- 5 give rise to cognitive functions.

## 1 **ACKNOWLEDGEMENTS**

2 This work was supported by the Deutsche Forschungsgemeinschaft via CRC 889  
3 (Cellular mechanisms of sensory processing; TP C07 to J.F.S.) and STA 431/11-2.

4 We thank Patricia Sprysch and Sandra Heinzl for excellent technical assistance. We  
5 are grateful to Karl-Klaus Conzelmann for kindly donating RV-SADΔG-mCherry  
6 (EnvA). We thank Michael Lingelbach and Edward Callaway for kindly donating  
7 pAAV-DIO-TVA<sup>66T</sup>-EGFP-oG.

8

## 9 **AUTHOR CONTRIBUTIONS**

10 J.F.S., J.G. and G.H. conceived the study. G.H. conducted and analysed all tracing  
11 experiments. J.G. and M.W. gave experimental advice. P.T. performed microscopic  
12 imaging. A.R. analysed the VIPCre/reeler/tdTomato mouse line. N.S, R.D. and S.B.  
13 performed the MRI experiments. G.H., N.S and J.F.S. wrote the original draft.

14

## 15 **DECLARATION OF INTERESTS**

16 The authors declare no competing interests.



## 1 REFERENCES

2

3 Ährlund-Richter, S., Xuan, Y., Anna van Lunteren, J., Kim, H., Ortiz, C., Pollak

4 Dorocic, I., Meletis, K., and Carlén, M. (2019). A whole-brain atlas of monosynaptic  
5 input targeting four different cell types in the medial prefrontal cortex of the mouse.  
6 *Nat. Neurosci.* 22, 657–668.

7 Andersson, J.L.R., and Sotiropoulos, S.N. (2016). An integrated approach to  
8 correction for off-resonance effects and subject movement in diffusion MR imaging.  
9 *Neuroimage* 125, 1063–1078.

10 Avants, B.B., Tustison, N.J., Song, G., Cook, P.A., Klein, A., and Gee, J.C. (2011). A  
11 reproducible evaluation of ANTs similarity metric performance in brain image  
12 registration. *Neuroimage* 54, 2033–2044.

13 Badea, A., Nicholls, P.J., Johnson, G.A., and Wetsel, W.C. (2007). Neuroanatomical  
14 phenotypes in the Reeler mouse. *Neuroimage* 34, 1363–1374.

15 Basser, P.J., Mattiello, J., and LeBihan, D. (1994). MR diffusion tensor spectroscopy  
16 and imaging. *Biophys. J.* 66, 259–267.

17 Boyle, M.P., Bernard, A., Thompson, C.L., Ng, L., Boe, A., Mortrud, M., Hawrylycz,  
18 M.J., Jones, A.R., Hevner, R.F., and Lein, E.S. (2011). Cell-type-specific  
19 consequences of reelin deficiency in the mouse neocortex, hippocampus, and  
20 amygdala. *J. Comp. Neurol.* 519, 2061–2089.

21 Butler, A.B., and Cotterill, R.M.J. (2006). Mammalian and avian neuroanatomy and  
22 the question of consciousness in birds. *Biol. Bull.* 211, 106–127.

23 Calabrese, A., and Woolley, S.M.N. (2015). Coding principles of the canonical  
24 cortical microcircuit in the avian brain. *Proc. Natl. Acad. Sci. U. S. A.* 112, 3517–  
25 3522.

26 Caviness, V.S. (1976). Patterns of cell and fiber distribution in the neocortex of the  
27 reeler mutant mouse. *J. Comp. Neurol.* 170, 435–447.

28 Caviness, V.S., and Rakic, P. (1978). Mechanisms of Cortical Development: A View  
29 From Mutations in Mice. *Annu. Rev. Neurosci.* 1, 297–326.

- 1 Caviness, V.S., and Yorke, C.H. (1976). Interhemispheric neocortical connections of  
2 the corpus callosum in the reeler mutant mouse: a study based on anterograde and  
3 retrograde methods. *J. Comp. Neurol.* *170*, 449–460.
- 4 Dekimoto, H., Terashima, T., and Katsuyama, Y. (2010). Dispersion of the neurons  
5 expressing layer specific markers in the reeler brain. *Dev. Growth Differ.* *52*, 181–  
6 193.
- 7 DeNardo, L.A., Berns, D.S., DeLoach, K., and Luo, L. (2015). Connectivity of mouse  
8 somatosensory and prefrontal cortex examined with trans-synaptic tracing. *Nat.*  
9 *Neurosci.* *18*, 1687–1697.
- 10 Diodato, A., Ruinat De Brimont, M., Yim, Y.S., Derian, N., Perrin, S., Pouch, J.,  
11 Klatzmann, D., Garel, S., Choi, G.B., and Fleischmann, A. (2016). Molecular  
12 signatures of neural connectivity in the olfactory cortex. *Nat. Commun.* *7*, 1–10.
- 13 Dugas-Ford, J., Rowell, J.J., and Ragsdale, C.W. (2012). Cell-type homologies and  
14 the origins of the neocortex. *Proc. Natl. Acad. Sci. U. S. A.* *109*, 16974–16979.
- 15 Feldmeyer, D. (2012). Excitatory neuronal connectivity in the barrel cortex. *Front.*  
16 *Neuroanat.* *6*, 1–22.
- 17 Fenlon, L.R., Suárez, R., and Richards, L.J. (2017). The anatomy, organisation and  
18 development of contralateral callosal projections of the mouse somatosensory cortex.  
19 *Brain Neurosci. Adv.* *1*, 1–9.
- 20 Fu, Y., Tucciarone, J.M., Espinosa, J.S., Sheng, N., Darcy, D.P., Nicoll, R. a, Huang,  
21 Z.J., and Stryker, M.P. (2014). A cortical circuit for gain control by behavioral state.  
22 *Cell* *156*, 1139–1152.
- 23 Garyfallidis, E., Brett, M., Amirbekian, B., Rokem, A., van der Walt, S., Descoteaux,  
24 M., and Nimmo-Smith, I. (2014). Dipy, a library for the analysis of diffusion MRI data.  
25 *Front. Neuroinform.* *8*, 1–17.
- 26 Grinvald, A., Lieke, E., Frostig, R., Gilbert, C., and Wiesel, T. (1986). Functional  
27 architecture of cortex revealed by optical imaging of intrinsic signals. *Nature* *324*,  
28 361–364.
- 29 Guy, J., and Staiger, J.F. (2017). The Functioning of a Cortex without Layers. *Front.*  
30 *Neuroanat.* *11*, 1–13.

- 1 Guy, J., Wagener, R.J., Möck, M., and Staiger, J.F. (2015). Persistence of Functional  
2 Sensory Maps in the Absence of Cortical Layers in the Somatosensory Cortex of  
3 Reeler Mice. *Cereb. Cortex* 25, 2517–2528.
- 4 Guy, J., Sachkova, A., Möck, M., Witte, M., Wagener, R.J., and Staiger, J.F. (2016).  
5 Intracortical Network Effects Preserve Thalamocortical Input Efficacy in a Cortex  
6 Without Layers. *Cereb. Cortex* 27, 4851–4866.
- 7 Hafner, G., Witte, M., Guy, J., Subhashini, N., Fenno, L.E., Ramakrishnan, C., Kim,  
8 Y.S., Deisseroth, K., Oberhuber, M., Conzelmann, K.-K., et al. (2019). Mapping  
9 Brain-Wide Afferent Inputs of Parvalbumin- Expressing GABAergic Neurons in Barrel  
10 Cortex Reveals Local and Long-Range Circuit Motifs. *Cell Rep.* 28, 3450–3461.
- 11 Harris, K.D., and Shepherd, G.M.G. (2015). The neocortical circuit: themes and  
12 variations. *Nat. Neurosci.* 18, 170–181.
- 13 Harsan, L.-A., Dávid, C., Reisert, M., Schnell, S., Hennig, J., von Elverfeldt, D., and  
14 Staiger, J.F. (2013). Mapping remodeling of thalamocortical projections in the living  
15 reeler mouse brain by diffusion tractography. *Proc. Natl. Acad. Sci. U. S. A.* 110,  
16 E1797-806.
- 17 Helms, G., Dathe, H., Kallenberg, K., and Dechent, P. (2008). High-resolution maps  
18 of magnetization transfer with inherent correction for RF inhomogeneity and T1  
19 relaxation obtained from 3D FLASH MRI. *Magn. Reson. Med.* 60, 1396–1407.
- 20 Imai, H., Yamamoto, T., Katsuyama, Y., Kikkawa, S., and Terashima, T. (2012).  
21 Subcortically and callosally projecting neurons are distinct neuronal pools in the  
22 motor cortex of the Reeler mouse. *Kobe J. Med. Sci.* 58, 86–95.
- 23 Imai, H., Shoji, H., Ogata, M., Kagawa, Y., Owada, Y., Miyakawa, T., Sakimura, K.,  
24 Terashima, T., and Katsuyama, Y. (2017). Dorsal Forebrain-Specific Deficiency of  
25 Reelin-Dab1 Signal Causes Behavioral Abnormalities Related to Psychiatric  
26 Disorders. *Cereb. Cortex* 27, 3485–3501.
- 27 Innocenti, G.M., and Price, D.J. (2005). Exuberance in the development of cortical  
28 networks. *Nat. Rev. Neurosci.* 6, 955–965.
- 29 Kasthuri, N., Hayworth, K.J., Berger, D.R., Schalek, R.L., Conchello, J.A., Knowles-  
30 Barley, S., Lee, D., Vázquez-Reina, A., Kaynig, V., Jones, T.R., et al. (2015).  
31 Saturated Reconstruction of a Volume of Neocortex. *Cell* 162, 648–661.

- 1 Kim, E.J., Jacobs, M.W., Ito-cole, T., and Callaway, E.M. (2016). Improved  
2 Monosynaptic Neural Circuit Tracing Using Engineered Rabies Virus Glycoproteins  
3 Report. *Cell Rep.* *15*, 1–8.
- 4 Klingler, E., Prados, J., Kebschull, J.M., Dayer, A., Zador, A.M., and Jabaudon, D.  
5 (2018). Single-cell molecular connectomics of intracortically-projecting neurons.  
6 *BioRxiv* 378760.
- 7 Kuo, G., Arnaud, L., Kronstad-O'Brien, P., and Cooper, J.A. (2005). Absence of Fyn  
8 and Src causes a Reeler-like phenotype. *J. Neurosci.* *25*, 8578–8586.
- 9 Lambert de Rouvroit, C., and Goffinet, A.M. (1998). The reeler mouse as a model of  
10 brain development. *Adv. Anat. Embryol. Cell Biol.* *150*, 1–106.
- 11 Lee, G.H., and D'Arcangelo, G. (2016). New Insights into Reelin-Mediated Signaling  
12 Pathways. *Front. Cell. Neurosci.* *10*, 1–8.
- 13 Lee, S., Kruglikov, I., Huang, Z.J., Fishell, G., and Rudy, B. (2013). A disinhibitory  
14 circuit mediates motor integration in the somatosensory cortex. *Nat. Neurosci.* *16*,  
15 1662–1670.
- 16 Lein, E.S., Hawrylycz, M.J., Ao, N., Ayres, M., Bensinger, A., Bernard, A., Boe, A.F.,  
17 Boguski, M.S., Brockway, K.S., Byrnes, E.J., et al. (2007). Genome-wide atlas of  
18 gene expression in the adult mouse brain. *Nature* *445*, 168–176.
- 19 Lemus, L., Ndez, A.H., Luna, R., Zainos, A., and Romo, R. (2010). Do sensory  
20 cortices process more than one sensory modality during perceptual judgments.  
21 *Neuron* *67*, 335–348.
- 22 De Leon Reyes, N.S., Mederos, S., Varela, I., Weiss, L.A., Perea, G., Galazo, M.J.,  
23 and Nieto, M. (2019). Transient callosal projections of L4 neurons are eliminated for  
24 the acquisition of local connectivity. *Nat. Commun.* *10*, 1–15.
- 25 Maruyama, A.T., and Komai, S. (2018). Auditory-induced response in the primary  
26 sensory cortex of rodents. *PLoS One* *13*, e0209266.
- 27 Miller, R.T. (2001). *Technical Immunohistochemistry: Achieving Reliability and*  
28 *Reproducibility of Immunostains.*
- 29 Miyamichi, K., Yael, S.-F., Marvin, S., Brandon C., W., Liqun, L., and Mizrahi, A.  
30 (2013). Dissecting local circuits: parvalbumin interneurons underlie broad feedback

- 1 control of olfactory bulb output. *Neuron* *80*, 1232–1245.
- 2 Molnár, Z., Adams, R., Goffinet, A.M., and Blakemore, C. (1998). The role of the first  
3 postmitotic cortical cells in the development of thalamocortical innervation in the  
4 reeler mouse. *J. Neurosci.* *18*, 5746–5765.
- 5 Motta, A., Berning, M., Boergens, K.M., Staffler, B., Beining, M., Loomba, S.,  
6 Schramm, C., Hennig, P., Wissler, H., and Helmstaedter, M. (2019). Dense  
7 connectomic reconstruction in layer 4 of the somatosensory cortex. *Science* (80-. ).  
8 366.
- 9 Pajevic, S., and Pierpaoli, C. (1999). Color schemes to represent the orientation of  
10 anisotropic tissues from diffusion tensor data: Application to white matter fiber tract  
11 mapping in the human brain. *Magn. Reson. Med.* *42*, 526–540.
- 12 Petreanu, L., Huber, D., Sobczyk, A., and Svoboda, K. (2007). Channelrhodopsin-2–  
13 assisted circuit mapping of long-range callosal projections. *Nat. Neurosci.* *10*, 663–  
14 668.
- 15 Pfeffer, C.K., Xue, M., He, M., Huang, Z.J., and Scanziani, M. (2013). Inhibition of  
16 inhibition in visual cortex: the logic of connections between molecularly distinct  
17 interneurons. *Nat. Neurosci.* *16*, 1068–1076.
- 18 Pielecka-Fortuna, J., Wagener, R.J., Martens, A.K., Goetze, B., Schmidt, K.F.,  
19 Staiger, J.F., and Löwel, S. (2015). The disorganized visual cortex in reelin-deficient  
20 mice is functional and allows for enhanced plasticity. *Brain Struct. Funct.* *220*, 3449–  
21 3467.
- 22 Polleux, F., Giger, R.J., Ginty, D.D., Kolodkin, A.L., and Ghosh, A. (1998). Patterning  
23 of cortical efferent projections by semaphorin-neuropilin interactions. *Science* (80-. ).  
24 282, 1904–1906.
- 25 Prönneke, A., Scheuer, B., Wagener, R.J., Möck, M., Witte, M., and Staiger, J.F.  
26 (2015). Characterizing VIP Neurons in the Barrel Cortex of VIPcre/tdTomato Mice  
27 Reveals Layer-Specific Differences. *Cereb. Cortex* *25*, 4854–4868.
- 28 Prume, M., Rollenhagen, A., and Lübke, J.H.R. (2018). Structural and Synaptic  
29 Organization of the Adult Reeler Mouse Somatosensory Neocortex: A Comparative  
30 Fine-Scale Electron Microscopic Study of Reeler With Wild Type Mice. *Front.*  
31 *Neuroanat.* *12*, 1–14.

- 1 Prume, M., Rollenhagen, A., Yakoubi, R., Sätzler, K., and Lübke, J.H.R. (2019).  
2 Quantitative Three-Dimensional Reconstructions of Excitatory Synaptic Boutons in  
3 Layer 5 of the Adult Human Temporal Lobe Neocortex: A Fine-Scale Electron  
4 Microscopic Analysis. *Cereb. Cortex* 29, 2797–2814.
- 5 Roth, G. (2015). Convergent evolution of complex brains and high intelligence.  
6 *Philos. Trans. R. Soc. B Biol. Sci.* 370.
- 7 Salinger, W.L., Ladrow, P., and Wheeler, C. (2003). Behavioral Phenotype of the  
8 Reeler Mutant Mouse: Effects of Reln Gene Dosage and Social Isolation. *Behav.*  
9 *Neurosci.* 117, 1257–1275.
- 10 Sasaki, Y., Cheng, C., Uchida, Y., Nakajima, O., Ohshima, T., Yagi, T., Taniguchi,  
11 M., Nakayama, T., Kishida, R., Kudo, Y., et al. (2002). Fyn and Cdk5 mediate  
12 semaphorin-3A signaling, which is involved in regulation of dendrite orientation in  
13 cerebral cortex. *Neuron* 35, 907–920.
- 14 Shepherd, G.M., and Rowe, T.B. (2017). Neocortical lamination: Insights from neuron  
15 types and evolutionary precursors. *Front. Neuroanat.* 11, 1–7.
- 16 Shigeno, S., Andrews, P.L.R., Ponte, G., and Fiorito, G. (2018). Cephalopod brains:  
17 An overview of current knowledge to facilitate comparison with vertebrates. *Front.*  
18 *Physiol.* 9, 1–16.
- 19 Silva, L.R., Gutnick, M.J., and Connors, B.W. (1991). Laminar distribution of neuronal  
20 membrane properties in neocortex of normal and reeler mouse. *J. Neurophysiol.* 66,  
21 2034–2040.
- 22 Sofroniew, N.J., Vlasov, Y.A., Hires, S.A., Freeman, J., and Svoboda, K. (2015).  
23 Neural coding in barrel cortex during whisker-guided locomotion. 1–19.
- 24 Steindler, D.A., and Colwell, S.A. (1976). Reeler mutant mouse: maintenance of  
25 appropriate and reciprocal connections in the cerebral cortex and thalamus. *Brain*  
26 *Res.* 105, 386–393.
- 27 Suárez, R., Fenlon, L.R., Marek, R., Avitan, L., Sah, P., Goodhill, G.J., and Richards,  
28 L.J. (2014). Balanced interhemispheric cortical activity is required for correct targeting  
29 of the corpus callosum. *Neuron* 82, 1289–1298.
- 30 Sun, Q., Li, X., Ren, M., Zhao, M., Zhong, Q., Ren, Y., Luo, P., Ni, H., Zhang, X.,

- 1 Zhang, C., et al. (2019). A whole-brain map of long-range inputs to GABAergic  
2 interneurons in the mouse medial prefrontal cortex. *Nat. Neurosci.* 22, 1357–1370.
- 3 Taniguchi, H., He, M., Wu, P., Kim, S., Paik, R., Sugino, K., Kvitsiani, D., Kvitsani, D.,  
4 Fu, Y., Lu, J., et al. (2011). A resource of Cre driver lines for genetic targeting of  
5 GABAergic neurons in cerebral cortex. *Neuron* 71, 995–1013.
- 6 Tervo, D.G.R., Hwang, B.Y., Viswanathan, S., Gaj, T., Lavzin, M., Ritola, K.D., Lindo,  
7 S., Michael, S., Kuleshova, E., Ojala, D., et al. (2016). A Designer AAV Variant  
8 Permits Efficient Retrograde Access to Projection Neurons. *Neuron* 92, 372–382.
- 9 Tremblay, R., Lee, S., and Rudy, B. (2016). GABAergic Interneurons in the  
10 Neocortex: From Cellular Properties to Circuits. *Neuron* 91, 260–292.
- 11 Tustison, N.J., Avants, B.B., Cook, P.A., and Gee, J.C. (2010). N4ITK: Improved N3  
12 bias correction with robust B-spline approximation. *IEEE Trans. Med. Imaging* 29,  
13 1310–1320.
- 14 Veraart, J., Novikov, D.S., Christiaens, D., Ades-aron, B., Sijbers, J., and Fieremans,  
15 E. (2016). Denoising of diffusion MRI using random matrix theory. *Neuroimage* 142,  
16 394–406.
- 17 Wagener, R.J., Dávid, C., Zhao, S., Haas, C. a, and Staiger, J.F. (2010). The  
18 somatosensory cortex of reeler mutant mice shows absent layering but intact  
19 formation and behavioral activation of columnar somatotopic maps. *J. Neurosci.* 30,  
20 15700–15709.
- 21 Wagener, R.J., Witte, M., Guy, J., Mingo-Moreno, N., Kugler, S., and Staiger, J.F.  
22 (2016). Thalamocortical Connections Drive Intracortical Activation of Functional  
23 Columns in the Mislaminated Reeler Somatosensory Cortex. *Cereb. Cortex* 26, 820–  
24 837.
- 25 Walker, F., Möck, M., Feyerabend, M., Guy, J., Wagener, R.J., Schubert, D., Staiger,  
26 J.F., and Witte, M. (2016). Parvalbumin- and Vasoactive intestinal polypeptide-  
27 expressing neocortical interneurons impose differential inhibition on Martinotti cells.  
28 *Nat. Commun.* 7, 1–8.
- 29 Wall, N.R., Parra, M.D. La, Sorokin, J.M., Taniguchi, H., Huang, Z.J., and Callaway,  
30 E.M. (2016). Brain-Wide Maps of Synaptic Input to Cortical Interneurons. *J. Neurosci.*  
31 36, 4000–4009.

- 1 Wickersham, I.R., Lyon, D.C., Barnard, R.J.O., Mori, T., Conzelmann, K., Young,  
2 J.A.T., and Callaway, E.M. (2007). Monosynaptic Restriction of Transsynaptic  
3 Tracing from Single, Genetically Targeted Neurons. *Neuron* *53*, 639–647.
- 4 Williams, L.E., and Holtmaat, A. (2019). Higher-order thalamocortical inputs gate  
5 synaptic long-term potentiation via disinhibition. *Neuron* *101*, 1–12.
- 6 Wu, K.Y., He, M., Hou, Q.Q., Sheng, A.L., Yuan, L., Liu, F., Liu, W.W., Li, G., Jiang,  
7 X.Y., and Luo, Z.G. (2014). Semaphorin 3A activates the guanosine triphosphatase  
8 Rab5 to promote growth cone collapse and organize callosal axon projections. *Sci.*  
9 *Signal.* *7*, 1–14.
- 10 Yabut, O., Renfro, A., Niu, S., Swann, J.W., Marín, O., and D’Arcangelo, G. (2007).  
11 Abnormal laminar position and dendrite development of interneurons in the reeler  
12 forebrain. *Brain Res.* *1140*, 75–83.
- 13 Yoshihara, Y., Setsu, T., Katsuyama, Y., Kikkawa, S., Terashima, T., and Maeda, K.  
14 (2010). Cortical layer V neurons in the auditory and visual cortices of normal, reeler,  
15 and yotari mice. *Kobe J. Med. Sci.* *56*, 50–59.
- 16 Yushkevich, P.A., Piven, J., Hazlett, H.C., Smith, R.G., Ho, S., Gee, J.C., and Gerig,  
17 G. (2006). User-guided 3D active contour segmentation of anatomical structures:  
18 Significantly improved efficiency and reliability. *Neuroimage* *31*, 1116–1128.
- 19 Zhang, S., Xu, M., Kamigaki, T., Hoang Do, J.P., Chang, W.-C., Jenvay, S.,  
20 Miyamichi, K., Luo, L., and Dan, Y. (2014). Long-range and local circuits for top-down  
21 modulation of visual cortex processing. *Science* (80-. ). *345*, 660–665.
- 22 Zhang, S., Xu, M., Chang, W.-C., Ma, C., Hoang Do, J.P., Jeong, D., Lei, T., Fan,  
23 J.L., and Dan, Y. (2016). Organization of long-range inputs and outputs of frontal  
24 cortex for top-down control. *Nat. Neurosci.* *19*, 1733–1742.
- 25 Zhou, X., Mansori, I., Fischer, T., Witte, M., and Staiger, J.F. (2020). Characterizing  
26 the morphology of somatostatin-expressing interneurons and their synaptic  
27 innervation pattern in the barrel cortex of the GIN mouse. *J. Comp. Neurol.* *528*, 244–  
28 260.

29

30



## 1 **FIGURE LEGENDS**

2

### 3 **Figure 1: Distribution of VIP cells is different between WT and reeler mice**

4 (A, A') Coronal section at the level of the barrel cortex of a WT and reeler mouse in  
5 which VIP neurons are labeled with tdTomato. The areal/nuclear locations of VIP  
6 expression remained the same in WT and reeler (scale bar: 1000  $\mu\text{m}$ ; Abbr.: Amy,  
7 Amygdala; RSA, retrosplenial agranular cortex; S1/S2, primary/secondary  
8 somatosensory cortex).

9 (B, B') Close-up of cortical tissue in WT and reeler mouse (insert in A, A'). In WT, VIP  
10 neurons showed a stronger bias towards upper layers (II-IV). In reeler, VIP neurons  
11 were uniformly dispersed across the cortical thickness (scale bar: 100  $\mu\text{m}$ ).

12

### 13 **Figure 2: RV-tracing in VIP-Cre mice is based on a different distribution and** 14 **number of VIP starter cells in WT and reeler mice**

15 (A) Viral constructs for RV-tracing. TVA<sup>66T</sup> is a mutated version of TVA, to which  
16 EnvA in the RV envelope has a reduced affinity. This ensures that low level Cre-  
17 independent TVA expression does not permit RV entry into cells. oG is the optimized  
18 rabies glycoprotein necessary for transsynaptic spread.

19 (B) Injection of Cre-dependent helper AAV on day 1 induces high expression of  
20 TVA<sup>66T</sup> and oG only in VIP cells. RV-mCherry pseudotyped with TVA-ligand EnvA is  
21 injected 14 days later to infect VIP neurons and spread from there to first-order  
22 presynaptic neurons using oG. Seven days later, starter VIP cells appear yellow due  
23 to the mixture of fluorophores, presynaptic neurons have solely mCherry.

24 (C, C') Coronal sections through an injection site in the barrel cortex of WT and reeler  
25 mice (scale bar: 1000  $\mu\text{m}$ ).

26 (D/D'-F/F') Inserts in C, C'. Cells marked by white arrowheads are double-labeled  
27 starter cells that have been co-transduced by AAV-TVA<sup>66T</sup>-EGFP-oG and RV-  
28 mCherry. Inserts at the bottom show some of these cells in higher resolution.

29 Exclusively RV-mCherry-positive cells represent local inputs, presynaptic to the  
30 starter cells, forming a dense network of cell bodies and neuropil (scale bar overview:  
31 100  $\mu\text{m}$ ; scale bar insert: 20  $\mu\text{m}$ ).

1 (G) Distribution of starter cells across the cortical depth. Cortical thickness was  
2 divided into 20 equal-sized bins. The proportion of starter cells in each bin was  
3 plotted. While in WT starter cells were predominantly in the upper third, starter cells  
4 in reeler were much more dispersed.

5 (H) Number of starter cells in each genotype. Purple circles represent individual  
6 animals. (n=7 per group; mean  $\pm$  SD).

7

### 8 **Figure 3: Long-range input to VIP cells in barrel cortex of WT and reeler mice**

9 (A-F, A'-F') Sections along the rostro-caudal extent of WT and reeler mice showing  
10 consistently labeled areas with presynaptic partners of VIP cells in barrel cortex. In  
11 the top overview panels, the white contour delineates the borders of the respective  
12 area. Higher magnification close-ups are shown below. Section planes are indicated  
13 on the schematic sagittal brain section. (scale bar overview: 1000  $\mu$ m; scale bar  
14 close-up: 200  $\mu$ m; Abbr.: AUDd/AUDp/AUDv, dorsal/primary/ventral auditory area;  
15 MOp/MOs, primary/secondary motor cortex; PO, posterior complex of the thalamus;  
16 S1-BF, primary somatosensory cortex, barrel field; S2, secondary somatosensory  
17 cortex; VISal/VISam/VISp, anterolateral/anteromedial/primary visual area; VPM,  
18 ventral posteromedial nucleus of the thalamus).

19

### 20 **Figure 4: Input magnitude from global cortical and subcortical areas highlight a** 21 **cortical phenotype**

22 Histograms representing the input magnitude from summed-up cell counts of brain  
23 areas. Reeler mice received overall less input per cell, which was due to less input  
24 from the ipsilateral cortex. Input from the contralateral hemisphere was increased in  
25 reeler whereas subcortical input remained unaffected. (n = 7 per group; mean  $\pm$  SD;  
26 \*p < 0.05, \*\*p < 0.01).

27

### 28 **Figure 5: Comparative analysis of the fraction of inputs from individual areas**

29 Mean proportion of RV-labeled cells in 41 individual areas normalized against the  
30 total number of inputs in the whole brain for the two genotypes. For motor cortex,  
31 primary somatosensory cortex body region, auditory cortex and visual cortex, the

1 summated proportions of the individual subareas are shown as well. Pairwise  
2 comparisons were carried out to assess differences in input fraction for individual  
3 areas. For individual values see Table 1 (n= 7 per group; mean  $\pm$  SD; \*p < 0.05;  
4 Abbr.: c, cortex).

5

## 6 **Figure 6: Distribution of projection neurons in cortical input areas**

7 (A-F) The thickness of the cortex was divided into 20 equal-sized bins. We plotted the  
8 fraction of inputs in a bin normalized against the total inputs of VIP cells from this area. In  
9 ipsilateral areas, the distribution of projection neurons had one peak that was usually shifted  
10 more superficially in reeler, except for visual cortex where the peak was just broader. The  
11 distribution of contralateral projection neurons from the barrel cortex was very different, with  
12 neurons in WT mostly in the upper third, while in reeler predominantly in the lower two thirds  
13 of the cortex (Abbr.: S1, primary somatosensory cortex; BF, barrel field).

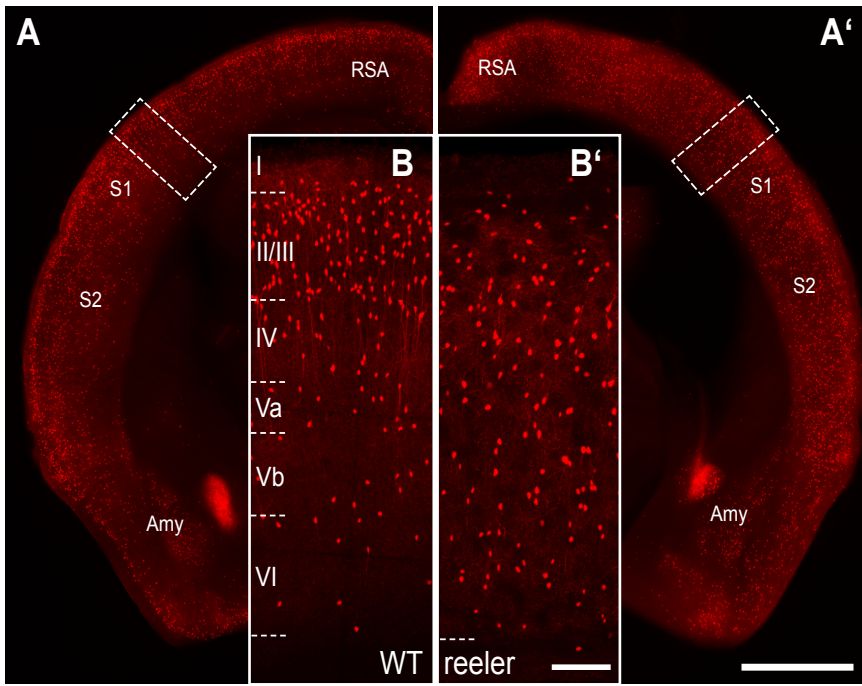

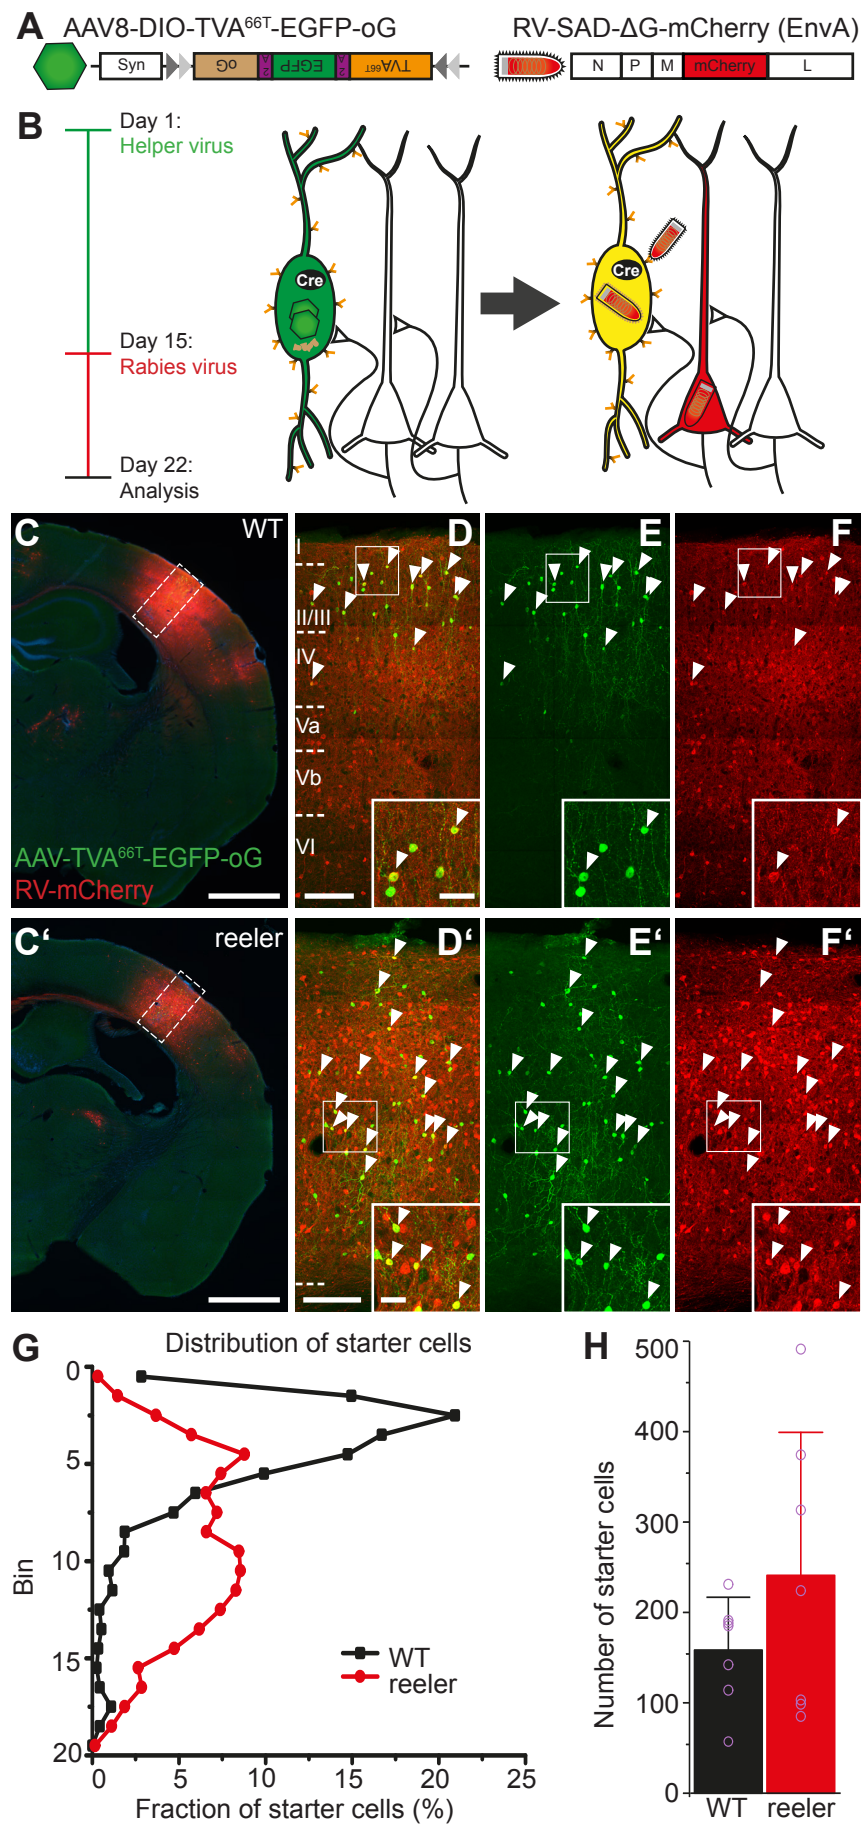

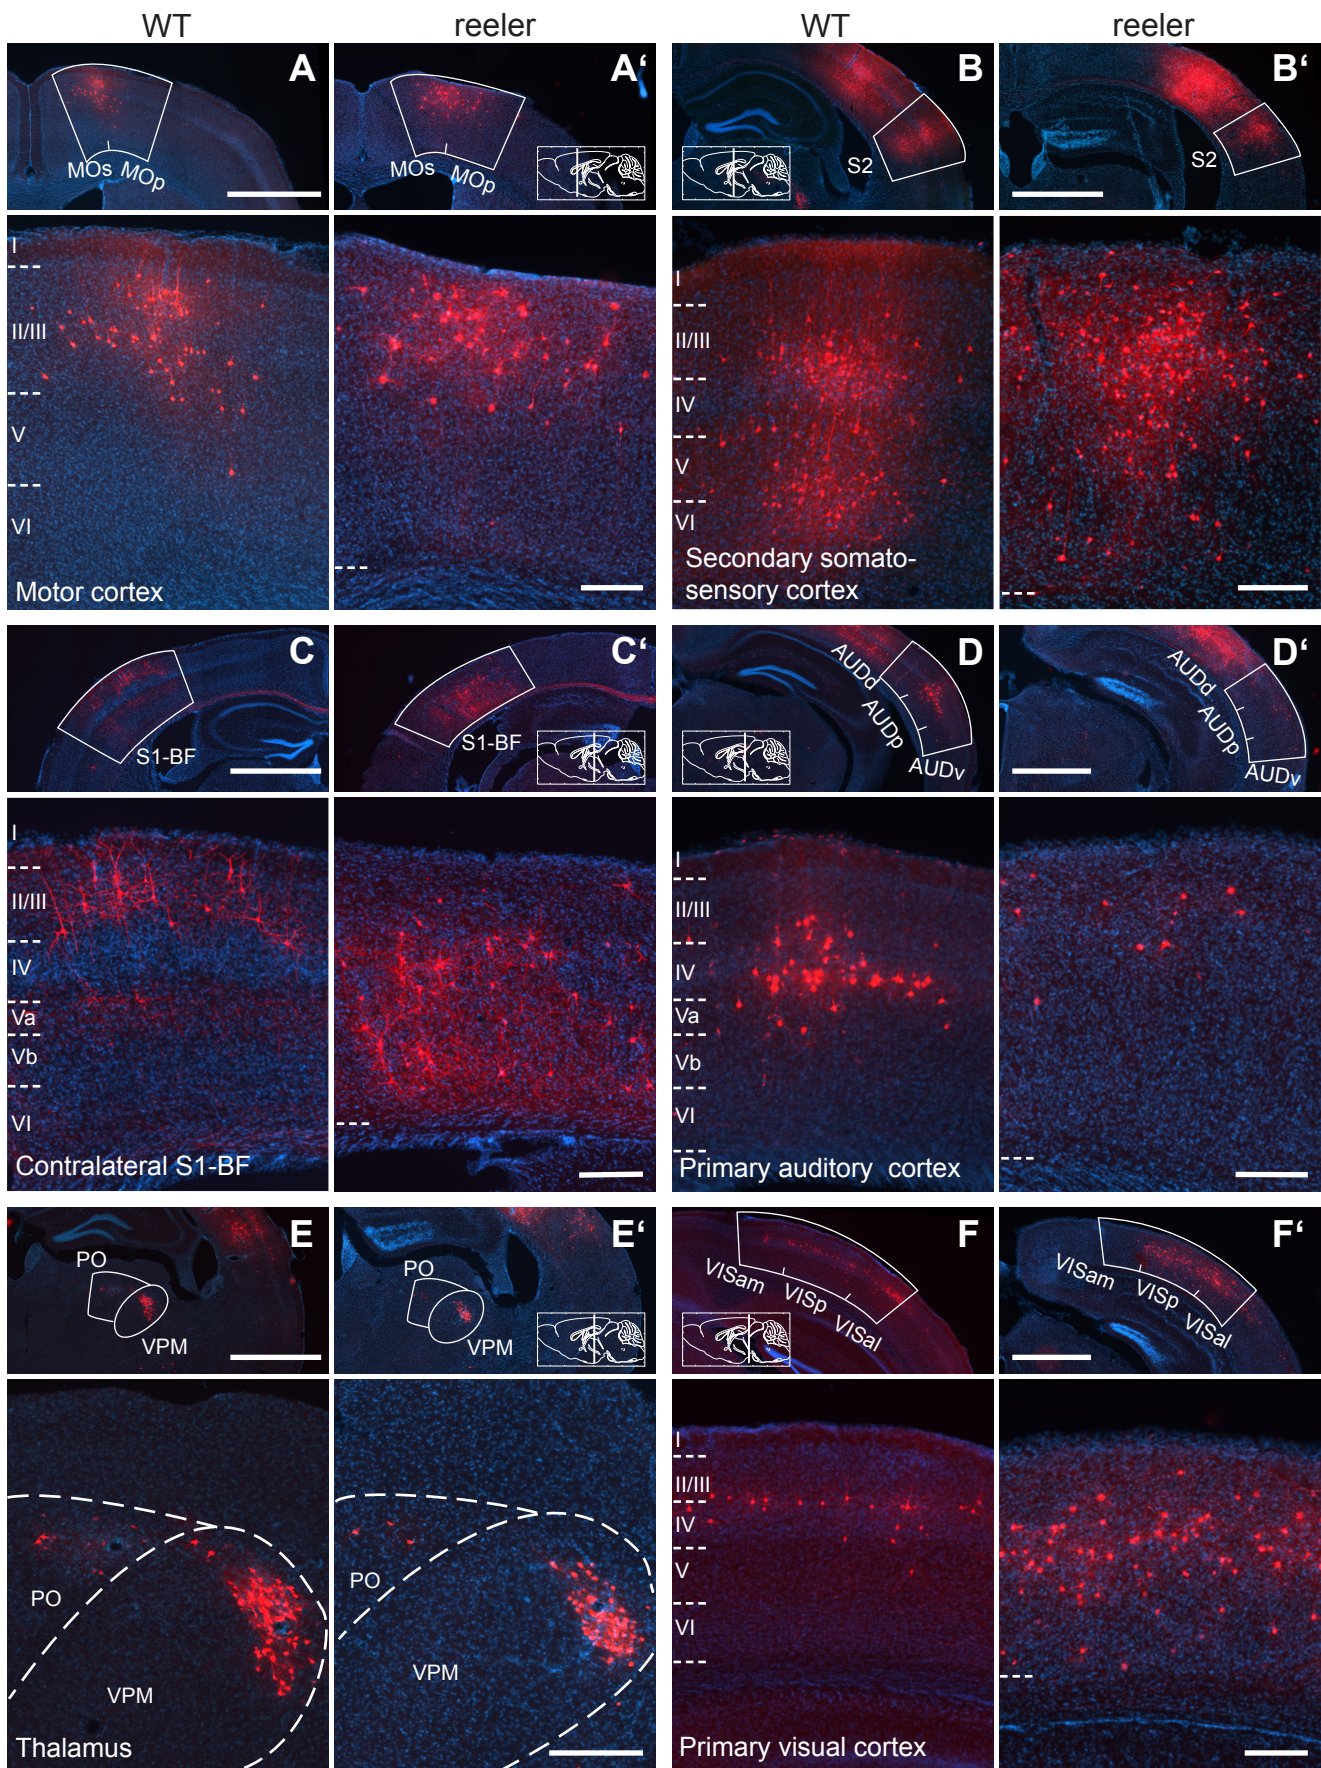

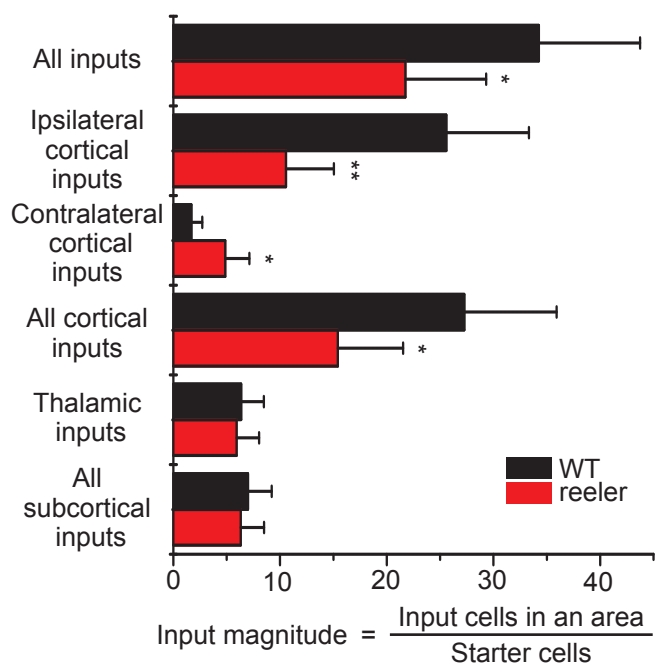

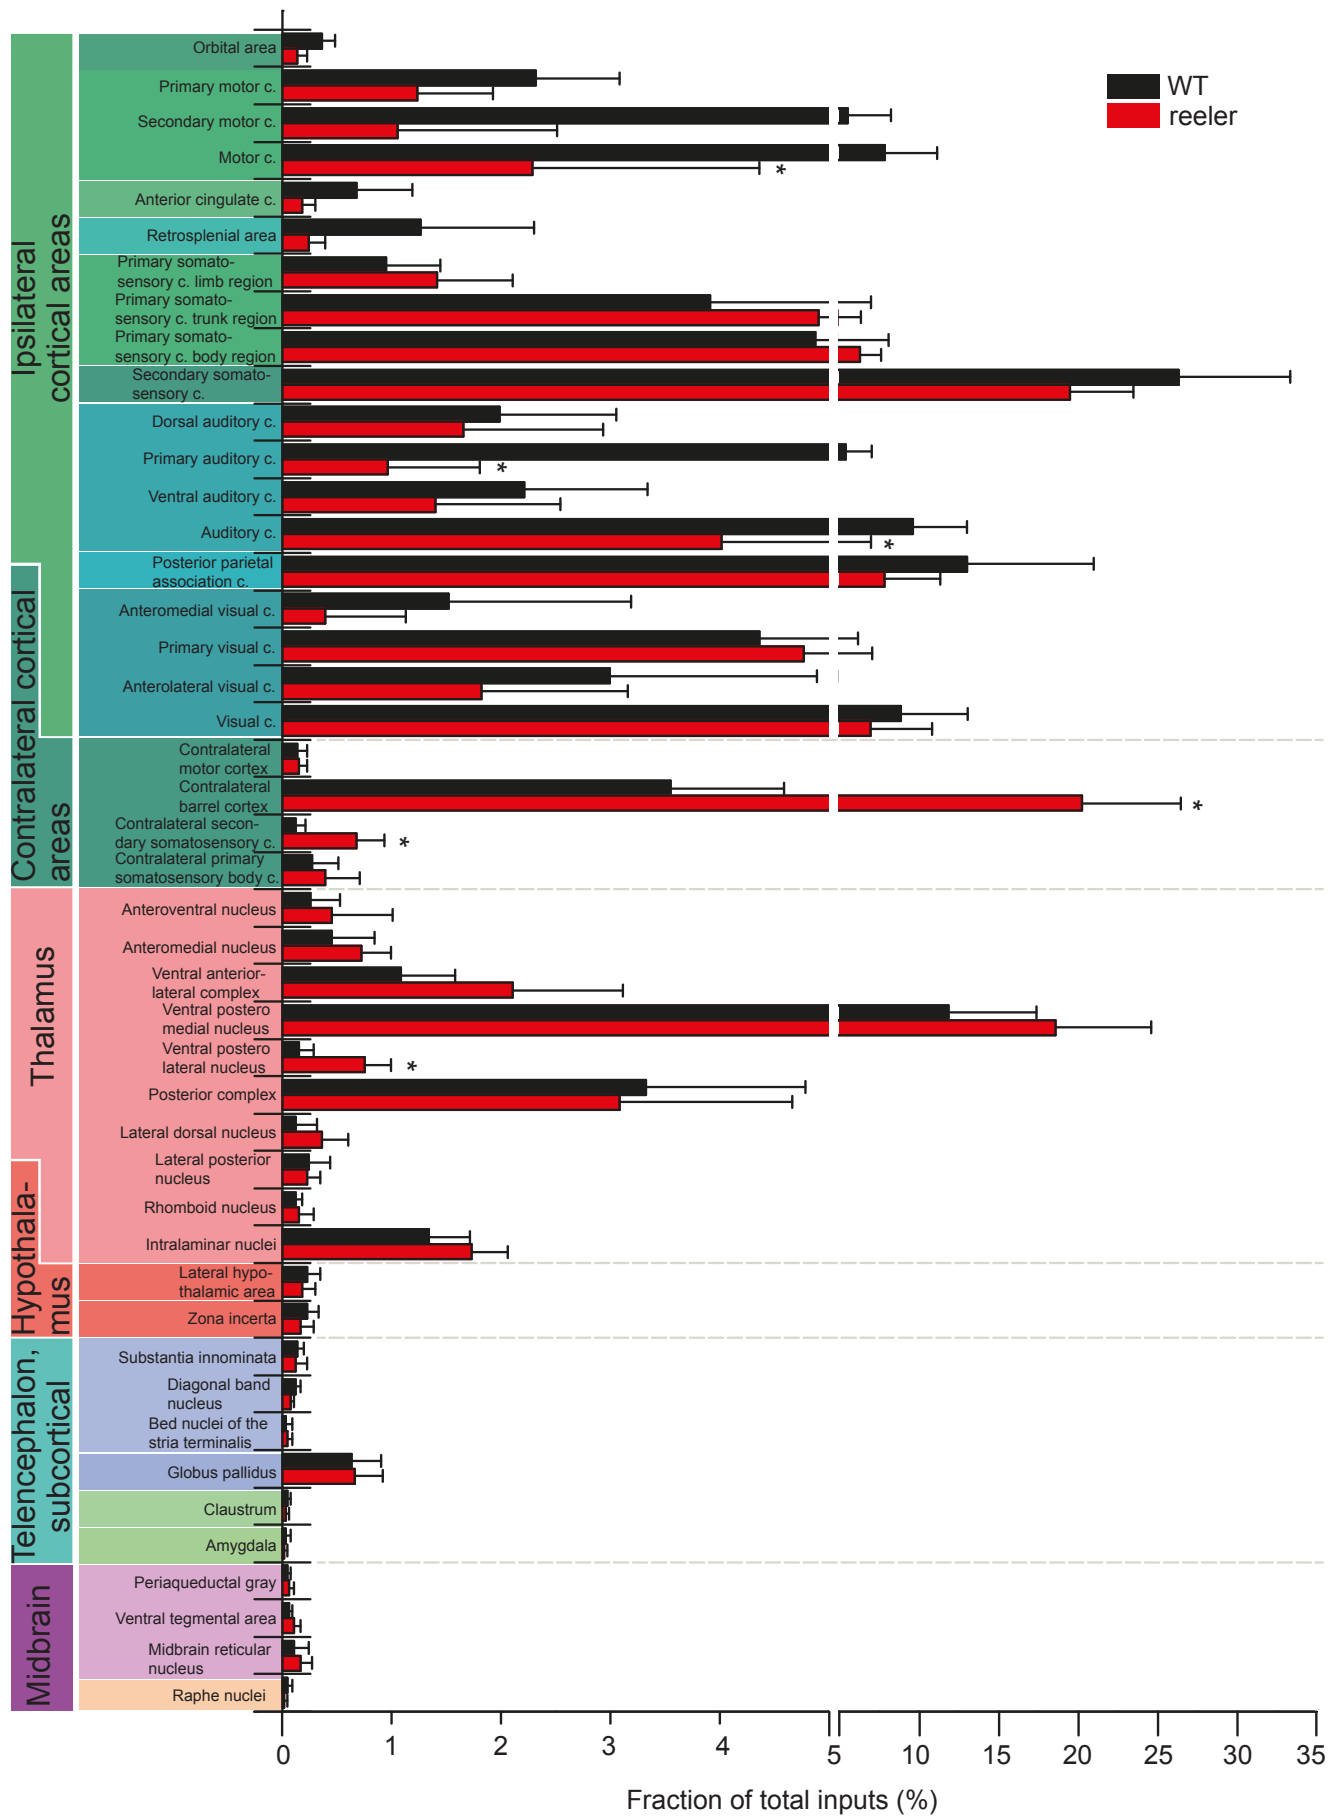



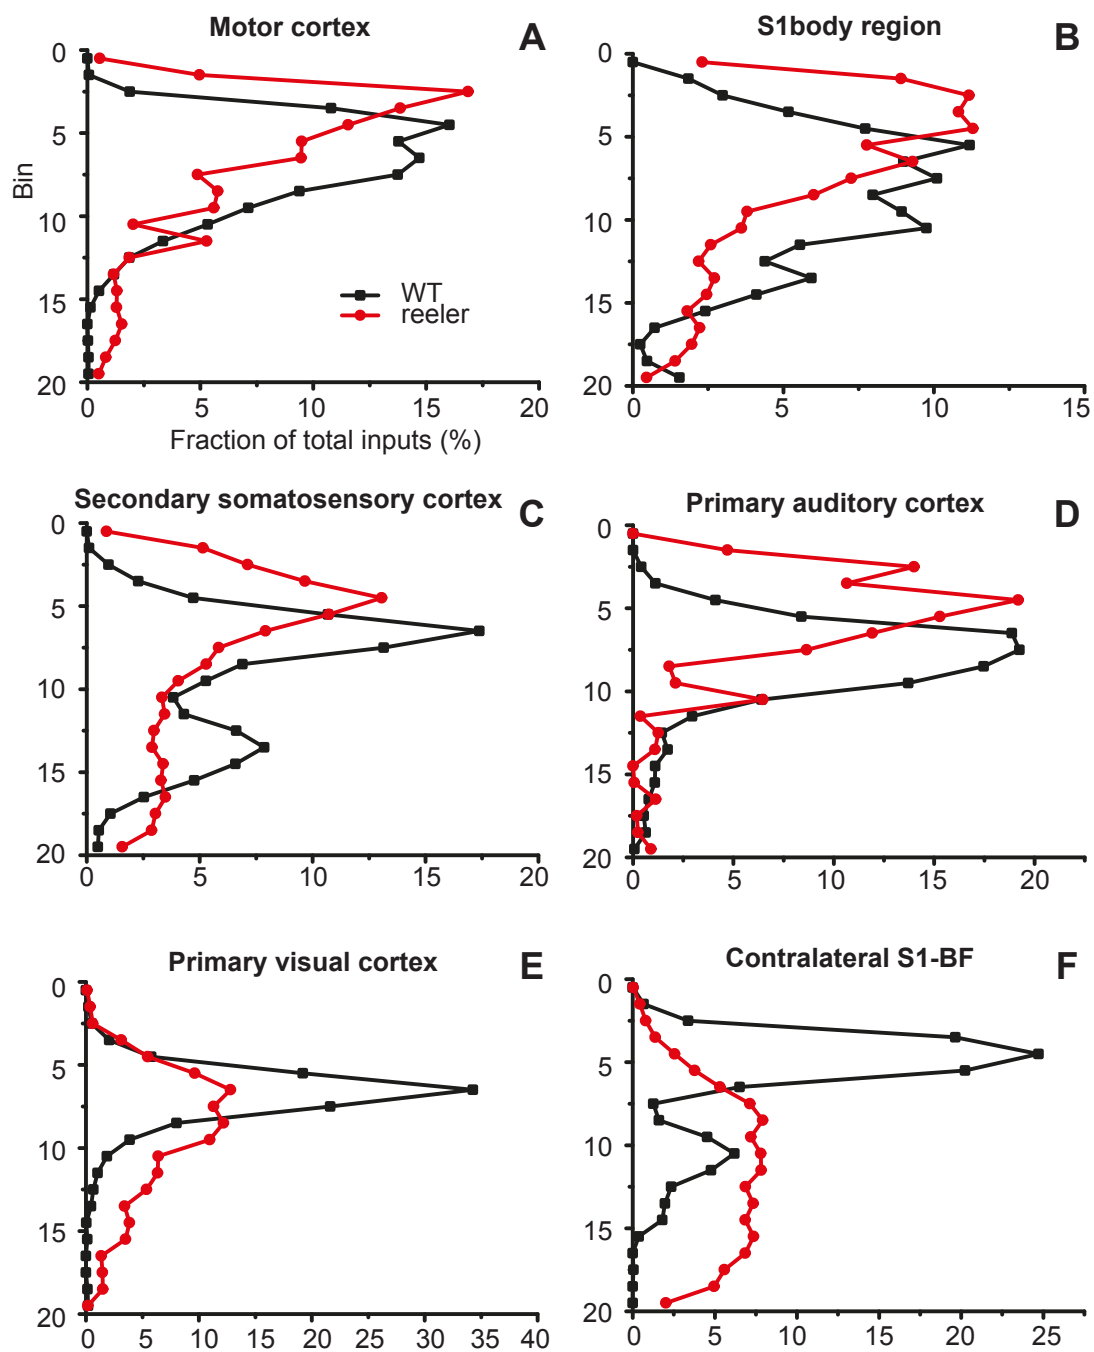

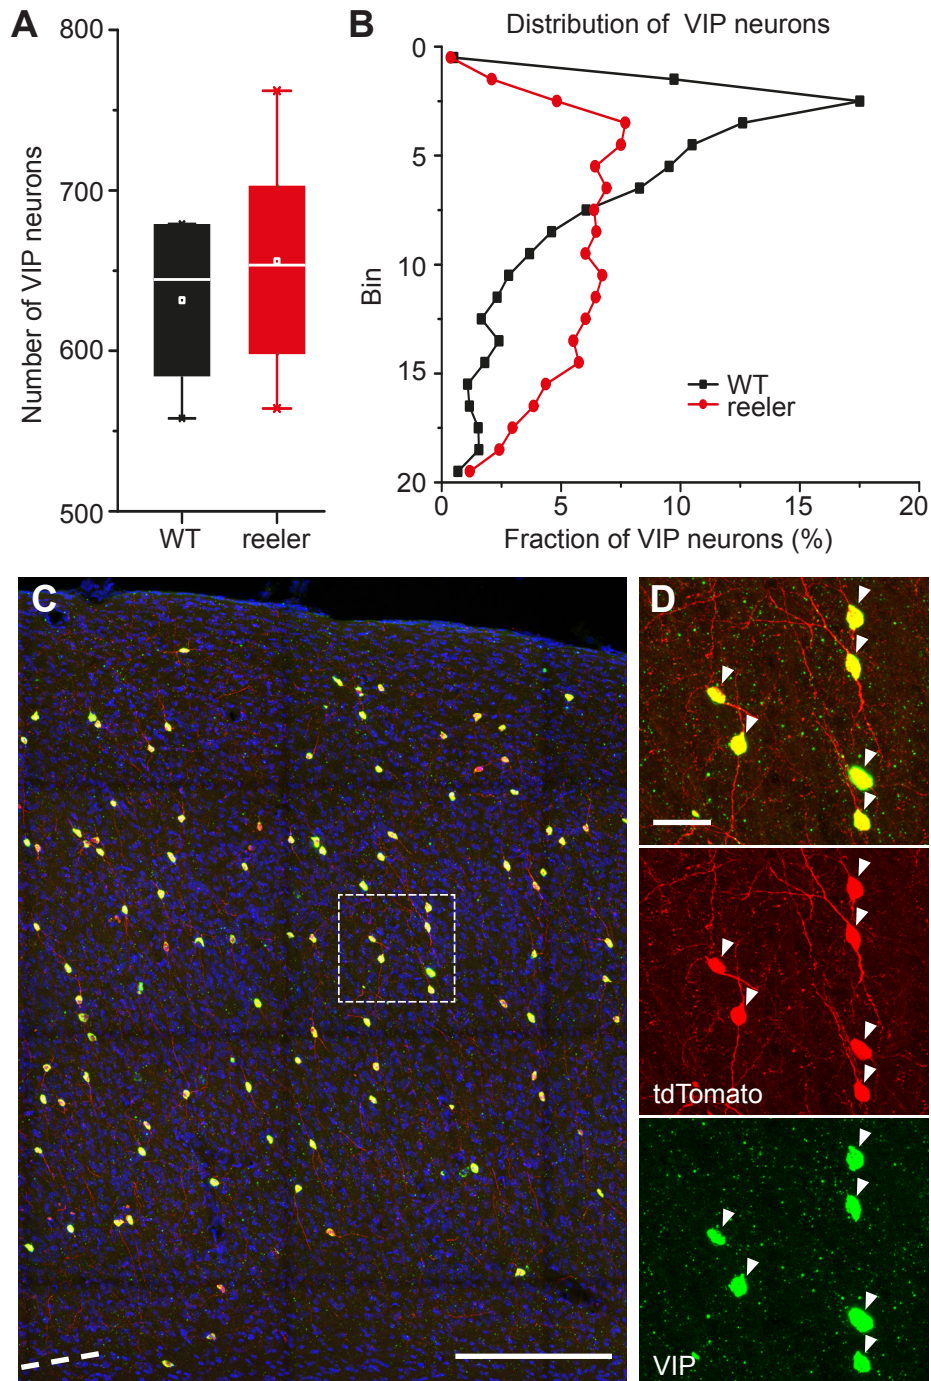

**Figure S1: VIP neurons in the reeler mouse retain numbers and VIP expression but lose laminar bias. Related to Figure 1.**

(A) Number of VIP neurons counted in a volume of cortex that spanned from pia to white matter and was 100  $\mu$ m wide and 240  $\mu$ m thick (n=5 WT mice; n=4 reeler mice; box plot: white line = median; white dot = mean). Counts were almost the same in WT and reeler.

(B) Distribution of VIP neurons across the cortical depth. In WT they showed a prominent peak in the upper layers. In reeler they were fairly uniformly distributed with few neurons close to pia and white matter.

(C) Section of barrel cortex of a VIP-Cre/reeler/tdTomato mouse stained against VIP-RNA (green) with fluorescent in-situ hybridization. Virtually all tdTomato cells overlapped with VIP signal (scale bar: 200  $\mu$ m).

(D) Insert of C with individual channels to reveal co-localization of tdTomato and VIP signal (scale bar: 20  $\mu$ m).

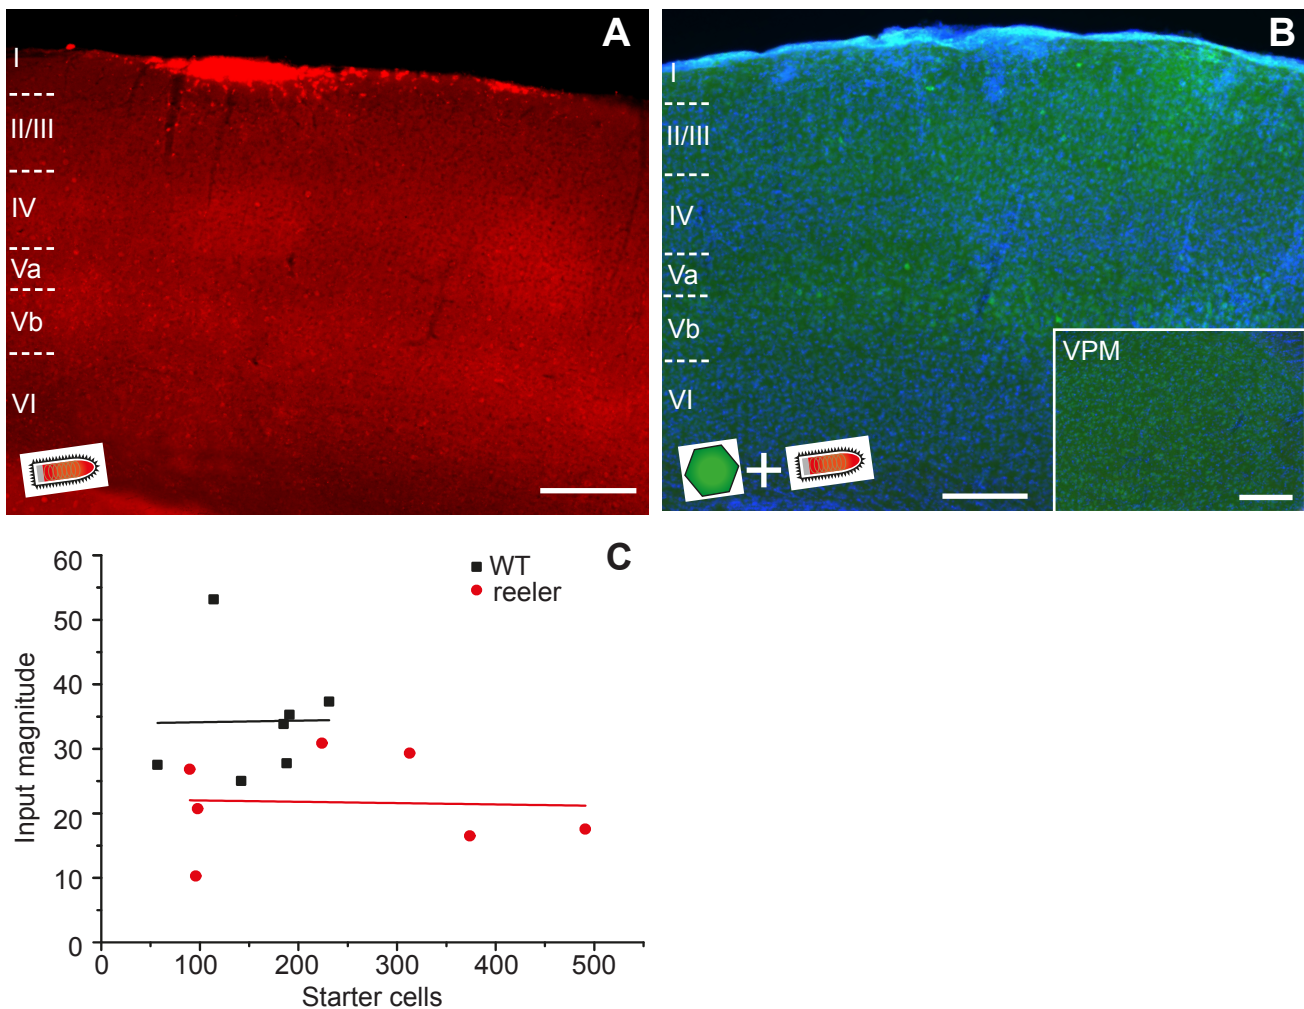

**Figure S2: Validation of constructs for RV-tracing in BL6 animals. Related to Figure 2.**

(A) Coronal section through the barrel cortex of a BL6 mouse (wild type) after injection of RV-mCherry, without prior injection of helper AAV. No transduced cells were detected. Uptake of RV into cells strictly depended on the presence of TVA (scale bar: 200  $\mu$ m).

(B) AAV8-DIO-TVA66T-EGFP-oG and RV-mCherry were injected with the same titer as in experimental conditions but in a BL6 (wild type) animal. We did not observe any RV labeling at the injection site nor in the ventral posteromedial nucleus of the thalamus (insert), a structure with reliable input to the barrel cortex. Therefore, this AAV does not show leak expression in the absence of Cre that would confound the tracing experiments (scale bar: 200  $\mu$ m).

(C) Input magnitude was plotted against starter cell count for WT and reeler. There was no correlation between the two variables. Therefore, the difference in input magnitude between genotypes cannot be explained by a difference in starter cell numbers.

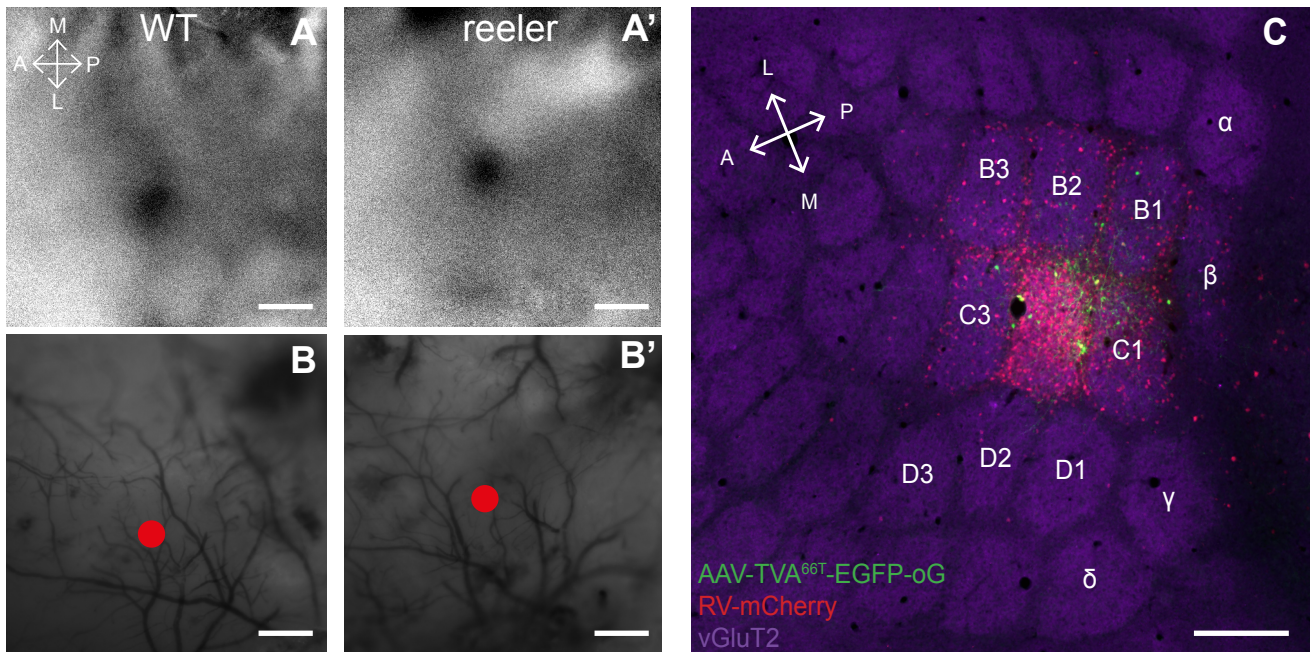

**Figure S3: Mapping the whisker C2-related cortical module in barrel cortex to coherently target the tracer injections. Related to Figure 2.**

(A, A') Red light was shone on the exposed cortical surface and its reflectance was measured with a CCD-camera, while the contralateral C2 whisker was stimulated. Repetitive whisker stimulation over 30 trials led to a localized change in blood flow, which induced a change in light reflectance visible as a dark spot. WT and reeler mice had very similar signals in terms of dynamics and size (scale bar: 200  $\mu$ m).

(B, B') Surface vasculature was overlaid with image in A and the location of the strongest change in reflectance was marked. The blood vessels were used as landmarks to guide the injection pipette to the dot (scale bar: 200  $\mu$ m).

(C) Tangential section of barrel cortex after targeted injection of AAV-TVA<sup>66T</sup>-EGFP-oG and RV-mCherry into the C2 column. Staining thalamic terminals with vesicular glutamate transporter 2 (vGluT2) allowed to visualize the barrels. The density of input cells was highest in C2 indicating that the majority of VIP starter cells was located within this barrel-related column (scale bar: 200  $\mu$ m).

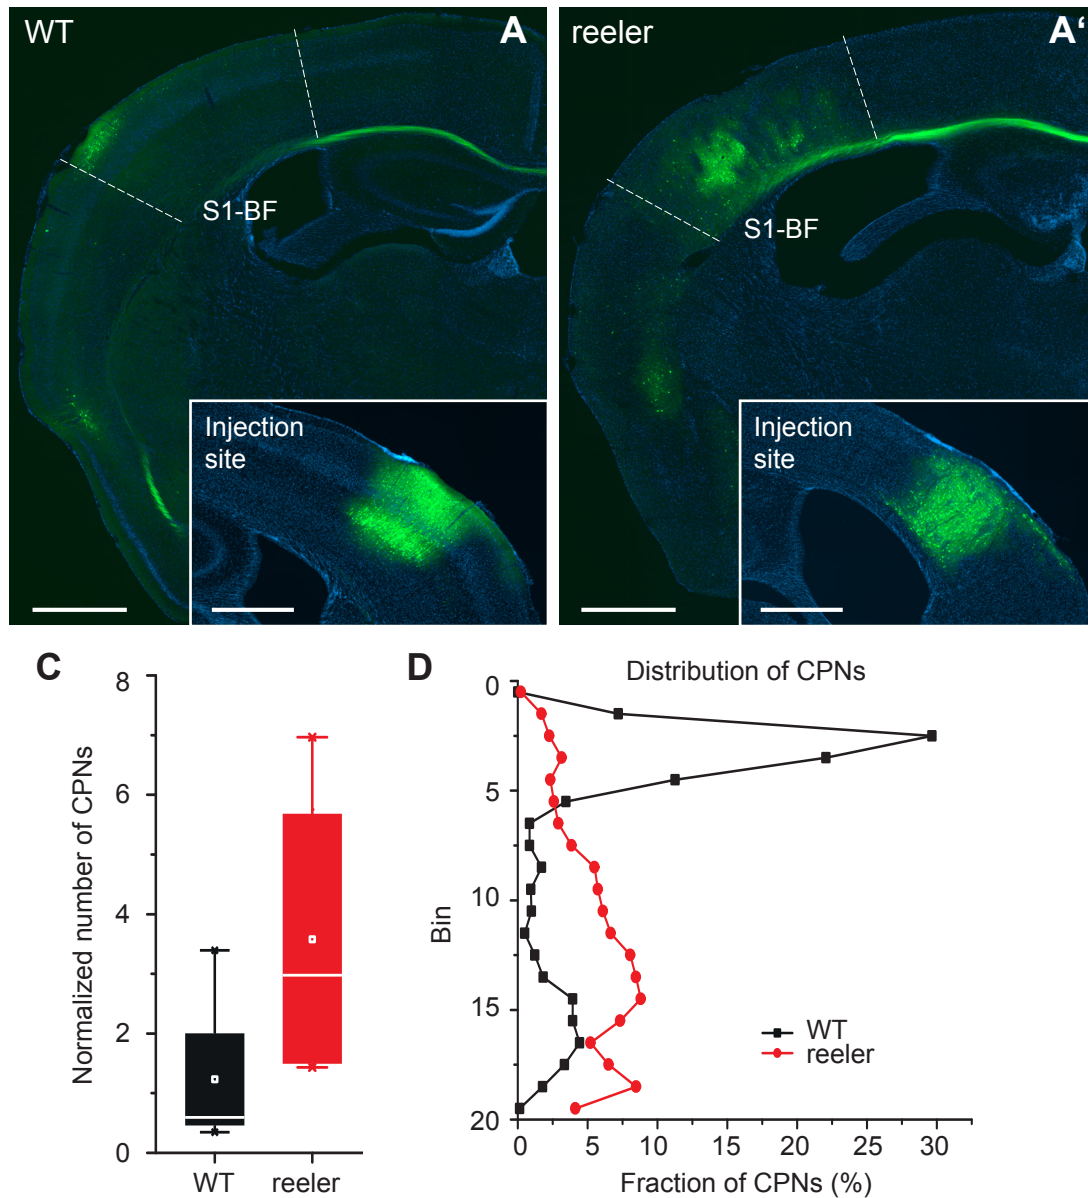

**Figure S4: Retrograde tracing of callosal projection neurons (CPNs). Related to Figure 4.**

(A, A') Coronal sections through the barrel cortex contralateral to the injection site of AAV-retro-EGFP. CPNs are more numerous and more dispersed in reeler. The injection site is shown in the insert (scale bar: overview: 1000  $\mu\text{m}$ ; insert 500  $\mu\text{m}$ ).

(B) Number of CPNs normalized by number of cells at the injection site in a volume from pia to white matter with a 200  $\mu\text{m}$  diameter around the injection site. Reeler mice had about 3 times more CPNs than WT.

(D) Distribution of CPNs across the cortical depth. The cortex was divided into 20 bins of equal size and the relative fraction of CPNs in each bin was plotted. CPNs in WT were predominantly in the upper part corresponding to LII/III. In reeler they were more in the deeper parts of the cortex. The distribution of all CPNs was similar to the distribution of CPNs targeting VIP cells in both genotypes.

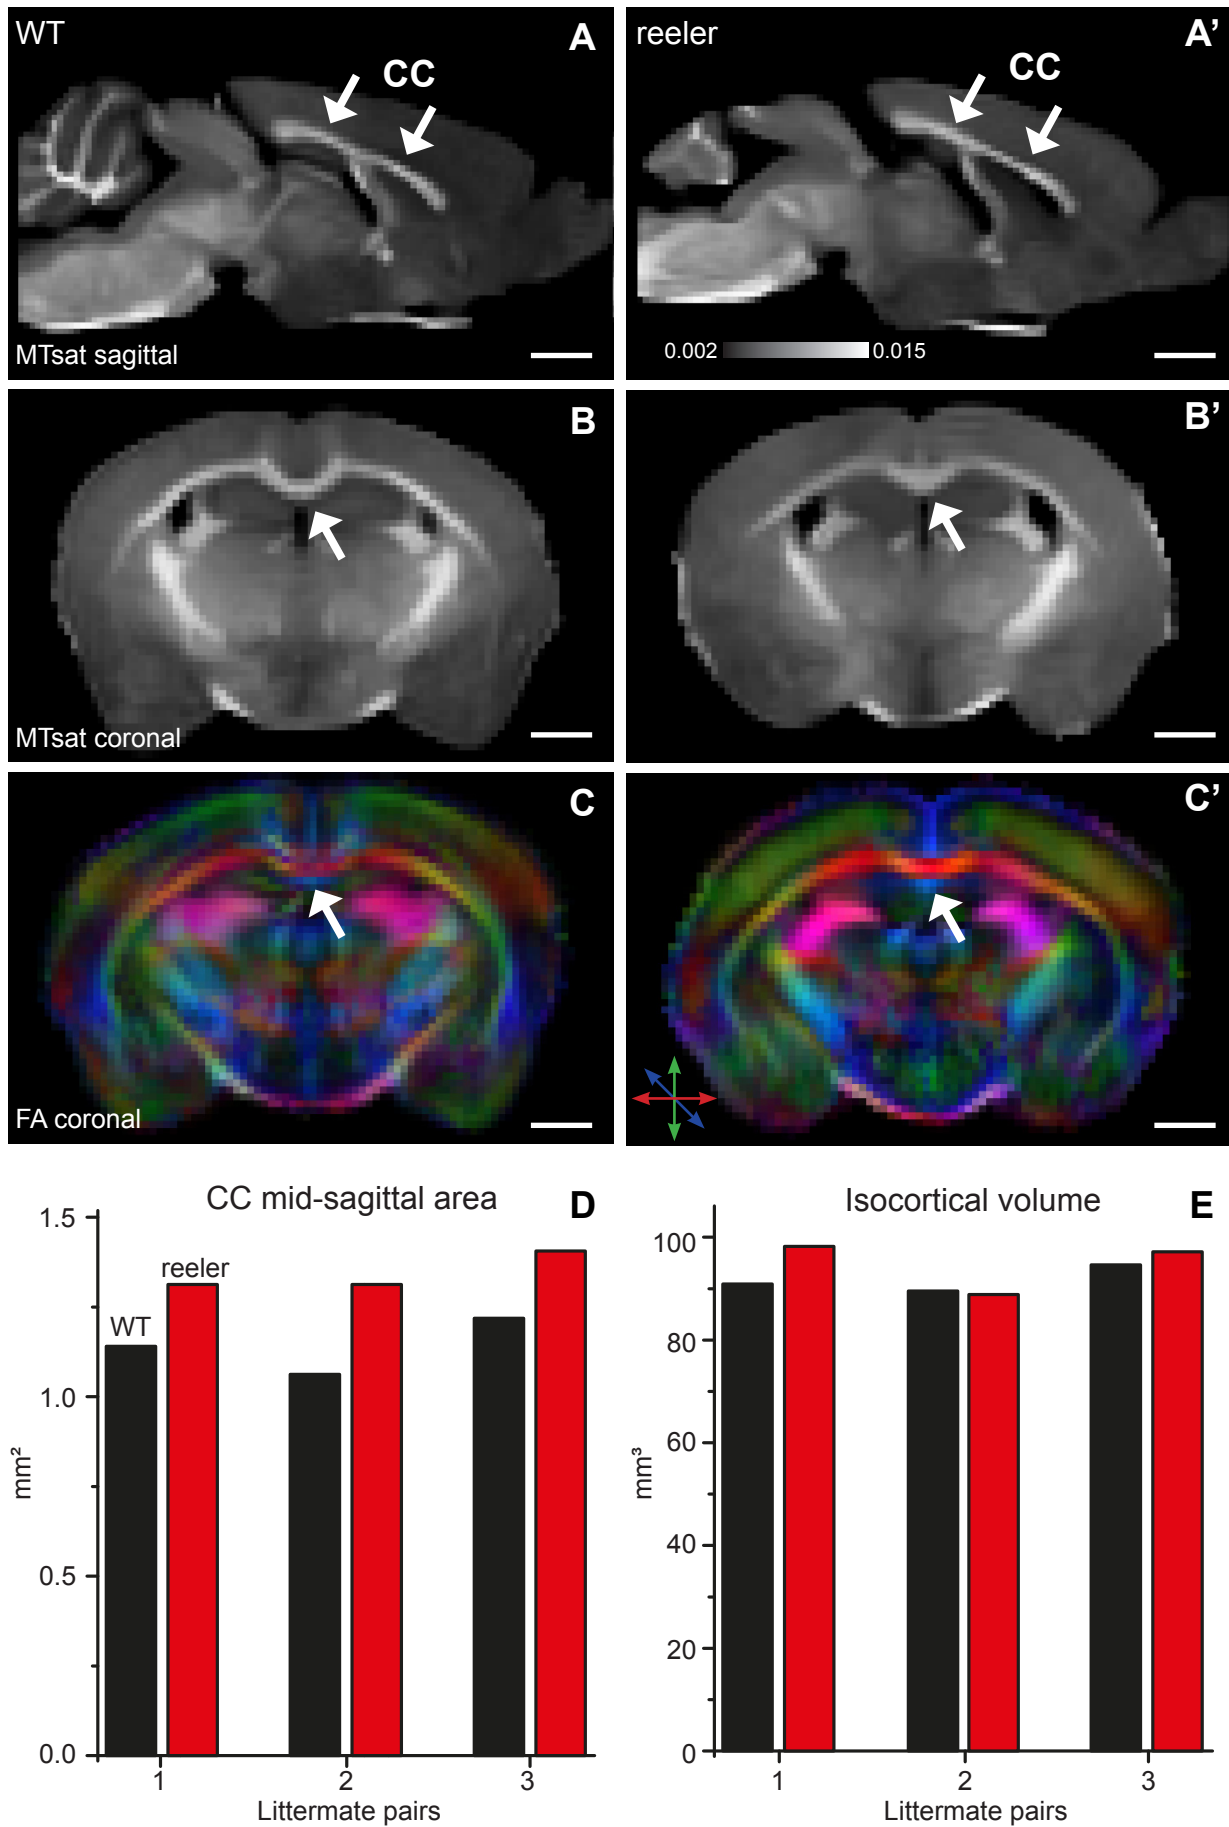

**Figure S5: MRI of WT and reeler mice to assess dimensions of corpus callosum. Related to Figure 4.**

(A, A') Sagittal maps of magnetization transfer saturation (MTsat) of a WT and reeler mouse brain acquired ex-vivo. These maps were used to determine the dimensions of the corpus callosum (CC).

(B, B') Coronal MTsat map of WT versus reeler mouse. At the midline the CC showed a different geometry between genotypes. In reeler mice the characteristic curvature of WT mice was absent so that the top of the CC appeared flatter.

(C, C') Fractional anisotropy (FA) maps show the color-coded directionality of fibers. Because fibers of the CC run in the medio-lateral direction they could be distinguished from whiter matter bundles more dorsally or more ventrally that run in the rostro-caudal direction.

(D) Mid-sagittal area of the CC of individual WT and reeler mice compared between littermate pairs. In each pair, the reeler mouse had a larger area, probably indicating that it is comprised of a higher number of callosal fibers.

(E) Total isocortical volume of individual WT and reeler mice compared between littermate pairs. The volume was almost the same except for one pair in which the reeler mouse showed a slightly higher volume.

**Table 1:** Mean and standard deviation (SD) for input magnitude from global areas. P-Values were calculated with pairwise comparisons and adjusted for multiple comparisons. Related to Figure 5.

| Area                          | WT    |      | Reeler |      | p-value | adj.p-value |
|-------------------------------|-------|------|--------|------|---------|-------------|
|                               | mean  | SD   | mean   | SD   |         |             |
| All inputs                    | 34.26 | 9.49 | 21.74  | 7.58 | 0.0183  | 0.0183*     |
| Ipsilateral cortical inputs   | 25.59 | 7.74 | 10.56  | 4.49 | 0.0008  | 0.0032**    |
| Contralateral cortical inputs | 1.68  | 1.03 | 4.86   | 2.26 | 0.0175  | 0.0355*     |
| All cortical inputs           | 27.27 | 8.64 | 15.42  | 6.11 | 0.0118  | 0.0355*     |
| Thalamic inputs               | 6.36  | 2.13 | 5.93   | 2.10 | 0.7124  | 1.0000      |
| All subcortical inputs        | 6.99  | 2.24 | 6.32   | 2.18 | 0.5819  | 0.5819      |



**Table 2:** Mean and standard deviation (SD) for input fraction from individual areas. P-Values were calculated with pairwise comparisons and adjusted for multiple comparisons. Related to Figure 6.

| Area                                        | WT    |      | Reeler |      | p-value | adj.p-value |
|---------------------------------------------|-------|------|--------|------|---------|-------------|
|                                             | mean  | SD   | mean   | SD   |         |             |
| Orbital area                                | 0.36  | 0.13 | 0.13   | 0.09 | 0.0023  | 0.0854      |
| Primary motor c.                            | 2.33  | 0.76 | 1.24   | 0.69 | 0.0158  | 0.5534      |
| Secondary motor c.                          | 5.55  | 2.72 | 1.06   | 1.46 | 0.0041  | 0.1469      |
| Motor c.                                    | 7.88  | 3.28 | 2.29   | 2.07 | 0.0070  | 0.0350*     |
| Anterior cingulate c.                       | 0.68  | 0.51 | 0.18   | 0.13 | 0.0407  | 1.0000      |
| Retrosplenial area                          | 1.26  | 1.04 | 0.25   | 0.15 | 0.0410  | 1.0000      |
| Primary somatosensory c. limb               | 0.96  | 0.49 | 1.42   | 0.69 | 0.1736  | 1.0000      |
| Primary somatosensory c. trunk              | 3.92  | 3.10 | 4.90   | 1.49 | 0.4637  | 1.0000      |
| Primary somatosensory c. body               | 4.87  | 3.24 | 6.32   | 1.33 | 0.3056  | 0.6113      |
| Secondary somatosensory c.                  | 26.27 | 6.99 | 19.47  | 3.98 | 0.0450  | 1.0000      |
| Dorsal auditory c.                          | 1.99  | 1.06 | 1.66   | 1.28 | 0.4557  | 1.0000      |
| Primary auditory c.                         | 5.43  | 1.64 | 0.96   | 0.85 | 0.0012  | 0.0443*     |
| Ventral auditory c.                         | 2.21  | 1.13 | 1.40   | 1.15 | 0.2055  | 1.0000      |
| Auditory c.                                 | 9.63  | 3.40 | 4.02   | 3.01 | 0.0070  | 0.0350*     |
| Posterior parietal associaton c.            | 13.02 | 7.95 | 7.87   | 3.49 | 0.1423  | 1.0000      |
| Anteromedial visual c.                      | 1.52  | 1.68 | 0.40   | 0.73 | 0.0724  | 1.0000      |
| Primary visual c.                           | 4.36  | 1.84 | 4.77   | 2.33 | 0.7251  | 1.0000      |
| Anterolateral visual c.                     | 3.00  | 1.89 | 1.83   | 1.34 | 0.2046  | 1.0000      |
| Visual c.                                   | 8.88  | 4.19 | 6.99   | 3.85 | 0.3962  | 0.6113      |
| Contralateral motor cortex                  | 0.14  | 0.08 | 0.16   | 0.07 | 0.6612  | 1.0000      |
| Contralateral barrel cortex                 | 3.55  | 1.04 | 20.22  | 6.20 | 0.0003  | 0.0134*     |
| Contralateral secondary somatosensory c.    | 0.12  | 0.09 | 0.67   | 0.25 | 0.0008  | 0.0298*     |
| Contralateral primary somatosensory body c. | 0.27  | 0.24 | 0.38   | 0.32 | 0.7104  | 1.0000      |
| Anteroventral nucleus                       | 0.26  | 0.27 | 0.45   | 0.57 | 0.4496  | 1.0000      |
| Anteromedial nucleus                        | 0.45  | 0.39 | 0.72   | 0.27 | 0.1704  | 1.0000      |
| Ventral anterior-lateral complex            | 1.09  | 0.50 | 2.11   | 1.01 | 0.0341  | 1.0000      |
| Ventral posteromedial complex               | 11.87 | 5.51 | 18.57  | 5.99 | 0.0262  | 0.8916      |
| Ventral posterolateral complex              | 0.16  | 0.13 | 0.76   | 0.23 | 0.0006  | 0.0233*     |
| Posterior complex                           | 3.33  | 1.45 | 3.08   | 1.59 | 0.4557  | 1.0000      |
| Lateral dorsal nucleus                      | 0.13  | 0.18 | 0.36   | 0.25 | 0.1098  | 1.0000      |
| Lateral posterior nucleus                   | 0.24  | 0.20 | 0.23   | 0.12 | 0.9147  | 1.0000      |
| Rhomboid nulceus                            | 0.11  | 0.07 | 0.16   | 0.13 | 0.4547  | 1.0000      |
| Intralaminar nucleus                        | 1.33  | 0.39 | 1.74   | 0.33 | 0.0572  | 1.0000      |
| Lateral hypothalamic area                   | 0.22  | 0.12 | 0.18   | 0.12 | 0.4721  | 1.0000      |
| Zona Incerta                                | 0.22  | 0.11 | 0.17   | 0.12 | 0.8048  | 1.0000      |
| Substantia innominata                       | 0.13  | 0.06 | 0.13   | 0.10 | 0.9016  | 1.0000      |
| Diagonal band                               | 0.12  | 0.05 | 0.07   | 0.04 | 0.0823  | 1.0000      |
| Bed nuclei of the stria terminalis          | 0.04  | 0.05 | 0.04   | 0.05 | 1.0000  | 1.0000      |
| Globus pallidus                             | 0.63  | 0.28 | 0.66   | 0.26 | 0.8299  | 1.0000      |
| Clastrum                                    | 0.05  | 0.02 | 0.03   | 0.03 | 0.2314  | 1.0000      |
| Amygdala                                    | 0.04  | 0.05 | 0.02   | 0.03 | 0.4951  | 1.0000      |
| Periaqueductal gray                         | 0.05  | 0.03 | 0.07   | 0.05 | 0.4469  | 1.0000      |
| Ventral tegmental area                      | 0.07  | 0.03 | 0.10   | 0.06 | 0.2039  | 1.0000      |
| Midbrain reticular nucleus                  | 0.10  | 0.13 | 0.16   | 0.10 | 0.1282  | 1.0000      |
| Raphe Nuclei                                | 0.04  | 0.05 | 0.02   | 0.03 | 0.3663  | 1.0000      |
